# Supplementary material
Source: ML conference proceedings conference paper supplement (https://www.ecva.net/papers/eccv_2020/papers_ECCV/html/123550341_ECCV_2020_paper.php)
Supplement: Supplementary file 9 [file 123550341-supp.zip]

Archive with 49 entries (44 files):
- 1086-supp/
- 1086-supp/splncs04.bst
- __MACOSX/
- __MACOSX/1086-supp/
- __MACOSX/1086-supp/._splncs04.bst
- 1086-supp/jvc.mp4
- __MACOSX/1086-supp/._jvc.mp4
- 1086-supp/ruler.sty
- __MACOSX/1086-supp/._ruler.sty
- 1086-supp/1086-supp.pdf
- 1086-supp/1086-supp.synctex.gz
- 1086-supp/.DS_Store
- __MACOSX/1086-supp/._.DS_Store
- 1086-supp/1086-supp.bbl
- 1086-supp/veni.mp4
- __MACOSX/1086-supp/._veni.mp4
- 1086-supp/1086-supp.tex
- 1086-supp/car.mp4
- __MACOSX/1086-supp/._car.mp4
- 1086-supp/pics/
- 1086-supp/pics/pic2.pdf
- __MACOSX/1086-supp/pics/
- __MACOSX/1086-supp/pics/._pic2.pdf
- 1086-supp/pics/pic3.pdf
- __MACOSX/1086-supp/pics/._pic3.pdf
- 1086-supp/pics/pic1.pdf
- __MACOSX/1086-supp/pics/._pic1.pdf
- 1086-supp/pics/pic4.pdf
- __MACOSX/1086-supp/pics/._pic4.pdf
- 1086-supp/pics/general.pdf
- __MACOSX/1086-supp/pics/._general.pdf
- __MACOSX/1086-supp/._pics
- 1086-supp/hitachi.mp4
- __MACOSX/1086-supp/._hitachi.mp4
- 1086-supp/eso-pic.sty
- __MACOSX/1086-supp/._eso-pic.sty
- 1086-supp/comment.sty
- __MACOSX/1086-supp/._comment.sty
- 1086-supp/llncs.cls
- __MACOSX/1086-supp/._llncs.cls
- 1086-supp/cvpr_eso.sty
- __MACOSX/1086-supp/._cvpr_eso.sty
- 1086-supp/1086-supp.aux
- 1086-supp/1086-supp.log
- 1086-supp/1086-supp.blg
- 1086-supp/1086-supp.bib
- __MACOSX/1086-supp/._1086-supp.bib
- 1086-supp/splncs.bst
- __MACOSX/1086-supp/._splncs.bst
