# Supplementary material
Source: ML conference proceedings conference paper supplement (https://www.ecva.net/papers/eccv_2020/papers_ECCV/html/123550341_ECCV_2020_paper.php)
Supplement: Supplementary file 9 [file 123550341-supp.zip › 1086-supp/1086-supp.aux]

\relax 
\citation{zhang2018image}
\citation{caballero2017real}
\citation{tao2017detail}
\citation{xue2019video}
\citation{sajjadi2018frame}
\citation{haris2018deep}
\citation{wang2019edvr}
\@writefile{toc}{\contentsline {title}{MuCAN: Multi-Correspondence Aggregation Network for Video Super-Resolution\unskip \ \ignorespaces  (Supplementary Material)}{1}\protected@file@percent }
\@writefile{toc}{\authcount {6}}
\@writefile{toc}{\contentsline {author}{Wenbo Li \and Xin Tao \and Taian Guo \and Lu Qi \and Jiangbo Lu \and Jiaya Jia}{1}\protected@file@percent }
\@writefile{toc}{\contentsline {section}{\numberline {1}More Ablation Study Results}{1}\protected@file@percent }
\@writefile{toc}{\contentsline {section}{\numberline {2}Results on the Vid4 Dataset}{1}\protected@file@percent }
\@writefile{lot}{\contentsline {table}{\numberline {1}{\ignorespaces Comparisons of results on the Y channel on the Vid4 dataset for $\times 4$ setting. }}{1}\protected@file@percent }
\newlabel{tab:res_vid4}{{1}{1}}
\citation{xue2019video}
\citation{xue2019video,tao2017detail,jo2018deep,haris2019recurrent}
\citation{tao2017detail}
\citation{xue2019video}
\citation{tao2017detail}
\citation{jo2018deep}
\citation{haris2019recurrent}
\citation{xue2019video}
\citation{tao2017detail}
\citation{jo2018deep}
\citation{haris2019recurrent}
\citation{haris2019recurrent}
\citation{jo2018deep}
\citation{haris2019recurrent}
\citation{xue2019video}
\citation{tao2017detail}
\@writefile{lof}{\contentsline {figure}{\numberline {1}{\ignorespaces Examples of the clip "LDVTG\_009" on the SPMCS dataset. We compare our method with TOF\nobreakspace  {}\cite  {xue2019video}, SPMC\nobreakspace  {}\cite  {tao2017detail}, DUF\nobreakspace  {}\cite  {jo2018deep} and RBPN\nobreakspace  {}\cite  {haris2019recurrent}.}}{2}\protected@file@percent }
\newlabel{fig:pic1}{{1}{2}}
\@writefile{lof}{\contentsline {figure}{\numberline {2}{\ignorespaces Examples of the clip "jvc\_009\_001" on the SPMCS dataset.}}{2}\protected@file@percent }
\newlabel{fig:pic2}{{2}{2}}
\@writefile{toc}{\contentsline {section}{\numberline {3}Additional Qualitative Results on the SPMCS Dataset}{2}\protected@file@percent }
\@writefile{lof}{\contentsline {figure}{\numberline {3}{\ignorespaces Examples of the clip "hitachi\_isee5\_001" on the SPMCS dataset.}}{3}\protected@file@percent }
\newlabel{fig:pic3}{{3}{3}}
\@writefile{lof}{\contentsline {figure}{\numberline {4}{\ignorespaces Examples of the clip "RMVTG\_024" on the SPMCS dataset.}}{3}\protected@file@percent }
\newlabel{fig:pic4}{{4}{3}}
\@writefile{toc}{\contentsline {section}{\numberline {4}Generalization Analysis}{3}\protected@file@percent }
\citation{wang2019edvr}
\@writefile{lof}{\contentsline {figure}{\numberline {5}{\ignorespaces Visualization of video frames in the wild for EDVR\nobreakspace  {}\cite  {wang2019edvr} and our MuCAN.}}{4}\protected@file@percent }
\newlabel{fig:general}{{5}{4}}
\@writefile{toc}{\contentsline {section}{\numberline {5}Video SR Demos of Our Proposed MuCAN Method}{4}\protected@file@percent }
\bibstyle{splncs04}
\bibdata{1086-supp}
\bibcite{caballero2017real}{1}
\bibcite{haris2018deep}{2}
\bibcite{haris2019recurrent}{3}
\bibcite{jo2018deep}{4}
\bibcite{sajjadi2018frame}{5}
\bibcite{tao2017detail}{6}
\bibcite{wang2019edvr}{7}
\bibcite{xue2019video}{8}
\bibcite{zhang2018image}{9}
