# Supplementary material
Source: ML conference proceedings conference paper supplement (https://www.ecva.net/papers/eccv_2020/papers_ECCV/html/123550341_ECCV_2020_paper.php)
Supplement: Supplementary file 9 [file 123550341-supp.zip › 1086-supp/1086-supp.bbl]

\begin{thebibliography}{1}
\providecommand{\url}[1]{\texttt{#1}}
\providecommand{\urlprefix}{URL }
\providecommand{\doi}[1]{https://doi.org/#1}

\bibitem{caballero2017real}
Caballero, J., Ledig, C., Aitken, A., Acosta, A., Totz, J., Wang, Z., Shi, W.:
  Real-time video super-resolution with spatio-temporal networks and motion
  compensation. In: Proceedings of the IEEE Conference on Computer Vision and
  Pattern Recognition. pp. 4778--4787 (2017)

\bibitem{haris2018deep}
Haris, M., Shakhnarovich, G., Ukita, N.: Deep back-projection networks for
  super-resolution. In: Proceedings of the IEEE conference on computer vision
  and pattern recognition. pp. 1664--1673 (2018)

\bibitem{haris2019recurrent}
Haris, M., Shakhnarovich, G., Ukita, N.: Recurrent back-projection network for
  video super-resolution. In: Proceedings of the IEEE Conference on Computer
  Vision and Pattern Recognition. pp. 3897--3906 (2019)

\bibitem{jo2018deep}
Jo, Y., Wug~Oh, S., Kang, J., Joo~Kim, S.: Deep video super-resolution network
  using dynamic upsampling filters without explicit motion compensation. In:
  Proceedings of the IEEE Conference on Computer Vision and Pattern
  Recognition. pp. 3224--3232 (2018)

\bibitem{sajjadi2018frame}
Sajjadi, M.S., Vemulapalli, R., Brown, M.: Frame-recurrent video
  super-resolution. In: Proceedings of the IEEE Conference on Computer Vision
  and Pattern Recognition. pp. 6626--6634 (2018)

\bibitem{tao2017detail}
Tao, X., Gao, H., Liao, R., Wang, J., Jia, J.: Detail-revealing deep video
  super-resolution. In: Proceedings of the IEEE International Conference on
  Computer Vision. pp. 4472--4480 (2017)

\bibitem{wang2019edvr}
Wang, X., Chan, K.C., Yu, K., Dong, C., Change~Loy, C.: Edvr: Video restoration
  with enhanced deformable convolutional networks. In: Proceedings of the IEEE
  Conference on Computer Vision and Pattern Recognition Workshops. pp.~0--0
  (2019)

\bibitem{xue2019video}
Xue, T., Chen, B., Wu, J., Wei, D., Freeman, W.T.: Video enhancement with
  task-oriented flow. International Journal of Computer Vision
  \textbf{127}(8),  1106--1125 (2019)

\bibitem{zhang2018image}
Zhang, Y., Li, K., Li, K., Wang, L., Zhong, B., Fu, Y.: Image super-resolution
  using very deep residual channel attention networks. In: Proceedings of the
  European Conference on Computer Vision (ECCV). pp. 286--301 (2018)

\end{thebibliography}
