# Supplementary material
Source: ML conference proceedings conference paper supplement (https://www.ecva.net/papers/eccv_2020/papers_ECCV/html/123550341_ECCV_2020_paper.php)
Supplement: Supplementary file 9 [file 123550341-supp.zip › 1086-supp/1086-supp.bib]

@STRING{CVPR = {CVPR}}
@STRING{ECCV = {ECCV}}
@STRING{ICCV = {ICCV}}
@STRING{ICIP = {ICIP}}
@STRING{IJCAI = {IJCAI}}
@STRING{IJCV = {International Journal on Computer Vision}}
@STRING{JOSA = {Journal of the Optical Society of America}}
@STRING{NIPS = {NIPS}}
@STRING{PAMI = {IEEE Trans. Pattern Anal. Mach. Intell.}}
@STRING{SIGGRAPH = {Proceedings of ACM SIGGRAPH}}
@STRING{TIP = {IEEE Transactions on Image Processing}}
@STRING{TOG = {ACM Trans. Graph.}}
@STRING{MICCAI = {International Conference on Medical image computing and computer-assisted intervention}}

@article{kim20183dsrnet,
	title={3DSRnet: Video Super-resolution using 3D Convolutional Neural Networks},
	author={Kim, Soo Ye and Lim, Jeongyeon and Na, Taeyoung and Kim, Munchurl},
	journal={arXiv preprint arXiv:1812.09079},
	year={2018}
}

@article{li2019fast,
	title={Fast 
	Residual Network for Video Super-Resolution},
	author={Li, Sheng and He, Fengxiang and Du, Bo and Zhang, Lefei and Xu, Yonghao and Tao, Dacheng},
	journal={arXiv preprint arXiv:1904.02870},
	year={2019}
}

@inproceedings{haris2019recurrent,
	title={Recurrent Back-Projection Network for Video Super-Resolution},
	author={Haris, Muhammad and Shakhnarovich, Gregory and Ukita, Norimichi},
	booktitle={Proceedings of the IEEE Conference on Computer Vision and Pattern Recognition},
	pages={3897--3906},
	year={2019}
}

@inproceedings{sajjadi2018frame,
	title={Frame-recurrent video super-resolution},
	author={Sajjadi, Mehdi SM and Vemulapalli, Raviteja and Brown, Matthew},
	booktitle={Proceedings of the IEEE Conference on Computer Vision and Pattern Recognition},
	pages={6626--6634},
	year={2018}
}

@inproceedings{tao2017detail,
	title={Detail-revealing deep video super-resolution},
	author={Tao, Xin and Gao, Hongyun and Liao, Renjie and Wang, Jue and Jia, Jiaya},
	booktitle={Proceedings of the IEEE International Conference on Computer Vision},
	pages={4472--4480},
	year={2017}
}

@inproceedings{caballero2017real,
	title={Real-time video super-resolution with spatio-temporal networks and motion compensation},
	author={Caballero, Jose and Ledig, Christian and Aitken, Andrew and Acosta, Alejandro and Totz, Johannes and Wang, Zehan and Shi, Wenzhe},
	booktitle={Proceedings of the IEEE Conference on Computer Vision and Pattern Recognition},
	pages={4778--4787},
	year={2017}
}

@inproceedings{liao2015video,
	title={Video super-resolution via deep draft-ensemble learning},
	author={Liao, Renjie and Tao, Xin and Li, Ruiyu and Ma, Ziyang and Jia, Jiaya},
	booktitle={Proceedings of the IEEE International Conference on Computer Vision},
	pages={531--539},
	year={2015}
}

@inproceedings{ma2015handling,
	title={Handling motion blur in multi-frame super-resolution},
	author={Ma, Ziyang and Liao, Renjie and Tao, Xin and Xu, Li and Jia, Jiaya and Wu, Enhua},
	booktitle={Proceedings of the IEEE Conference on Computer Vision and Pattern Recognition},
	pages={5224--5232},
	year={2015}
}

@inproceedings{dai2017deformable,
	title={Deformable convolutional networks},
	author={Dai, Jifeng and Qi, Haozhi and Xiong, Yuwen and Li, Yi and Zhang, Guodong and Hu, Han and Wei, Yichen},
	booktitle={Proceedings of the IEEE international conference on computer vision},
	pages={764--773},
	year={2017}
}

@article{tian2018tdan,
	title={TDAN: Temporally Deformable Alignment Network for Video Super-Resolution},
	author={Tian, Yapeng and Zhang, Yulun and Fu, Yun and Xu, Chenliang},
	journal={arXiv preprint arXiv:1812.02898},
	year={2018}
}

@inproceedings{wang2019edvr,
	title={Edvr: Video restoration with enhanced deformable convolutional networks},
	author={Wang, Xintao and Chan, Kelvin CK and Yu, Ke and Dong, Chao and Change Loy, Chen},
	booktitle={Proceedings of the IEEE Conference on Computer Vision and Pattern Recognition Workshops},
	pages={0--0},
	year={2019}
}

@inproceedings{nah2019ntire,
	title={NTIRE 2019 Challenge on Video Deblurring and Super-Resolution: Dataset and Study},
	author={Nah, Seungjun and Baik, Sungyong and Hong, Seokil and Moon, Gyeongsik and Son, Sanghyun and Timofte, Radu and Mu Lee, Kyoung},
	booktitle={Proceedings of the IEEE Conference on Computer Vision and Pattern Recognition Workshops},
	pages={0--0},
	year={2019}
}

@article{xue2019video,
	title={Video enhancement with task-oriented flow},
	author={Xue, Tianfan and Chen, Baian and Wu, Jiajun and Wei, Donglai and Freeman, William T},
	journal={International Journal of Computer Vision},
	volume={127},
	number={8},
	pages={1106--1125},
	year={2019},
	publisher={Springer}
}

@article{liu2013bayesian,
	title={On Bayesian adaptive video super resolution},
	author={Liu, Ce and Sun, Deqing},
	journal={IEEE transactions on pattern analysis and machine intelligence},
	volume={36},
	number={2},
	pages={346--360},
	year={2013},
	publisher={IEEE}
}

@article{wang2004image,
	title={Image quality assessment: from error visibility to structural similarity},
	author={Wang, Zhou and Bovik, Alan C and Sheikh, Hamid R and Simoncelli, Eero P and others},
	journal={IEEE transactions on image processing},
	volume={13},
	number={4},
	pages={600--612},
	year={2004}
}

@article{freeman2002example,
	title={Example-based super-resolution},
	author={Freeman, William T and Jones, Thouis R and Pasztor, Egon C},
	journal={IEEE Computer graphics and Applications},
	number={2},
	pages={56--65},
	year={2002},
	publisher={IEEE}
}

@inproceedings{glasner2009super,
	title={Super-resolution from a single image},
	author={Glasner, Daniel and Bagon, Shai and Irani, Michal},
	booktitle={2009 IEEE 12th international conference on computer vision},
	pages={349--356},
	year={2009},
	organization={IEEE}
}

@article{yang2010image,
	title={Image super-resolution via sparse representation},
	author={Yang, Jianchao and Wright, John and Huang, Thomas S and Ma, Yi},
	journal={IEEE transactions on image processing},
	volume={19},
	number={11},
	pages={2861--2873},
	year={2010},
	publisher={IEEE}
}

@article{freedman2011image,
	title={Image and video upscaling from local self-examples},
	author={Freedman, Gilad and Fattal, Raanan},
	journal={ACM Transactions on Graphics (TOG)},
	volume={30},
	number={2},
	pages={12},
	year={2011},
	publisher={ACM}
}

@inproceedings{timofte2013anchored,
	title={Anchored neighborhood regression for fast example-based super-resolution},
	author={Timofte, Radu and De Smet, Vincent and Van Gool, Luc},
	booktitle={Proceedings of the IEEE international conference on computer vision},
	pages={1920--1927},
	year={2013}
}

@inproceedings{timofte2014a+,
	title={A+: Adjusted anchored neighborhood regression for fast super-resolution},
	author={Timofte, Radu and De Smet, Vincent and Van Gool, Luc},
	booktitle={Asian conference on computer vision},
	pages={111--126},
	year={2014},
	organization={Springer}
}

@inproceedings{schulter2015fast,
	title={Fast and accurate image upscaling with super-resolution forests},
	author={Schulter, Samuel and Leistner, Christian and Bischof, Horst},
	booktitle={Proceedings of the IEEE Conference on Computer Vision and Pattern Recognition},
	pages={3791--3799},
	year={2015}
}

@article{yang2012coupled,
	title={Coupled dictionary training for image super-resolution},
	author={Yang, Jianchao and Wang, Zhaowen and Lin, Zhe and Cohen, Scott and Huang, Thomas},
	journal={IEEE transactions on image processing},
	volume={21},
	number={8},
	pages={3467--3478},
	year={2012},
	publisher={IEEE}
}

@inproceedings{perez2016psyco,
	title={Psyco: Manifold span reduction for super resolution},
	author={P{\'e}rez-Pellitero, Eduardo and Salvador, Jordi and Ruiz-Hidalgo, Javier and Rosenhahn, Bodo},
	booktitle={Proceedings of the IEEE Conference on Computer Vision and Pattern Recognition},
	pages={1837--1845},
	year={2016}
}

@inproceedings{yang2010exploiting,
	title={Exploiting self-similarities for single frame super-resolution},
	author={Yang, Chih-Yuan and Huang, Jia-Bin and Yang, Ming-Hsuan},
	booktitle={Asian conference on computer vision},
	pages={497--510},
	year={2010},
	organization={Springer}
}

@inproceedings{huang2015single,
	title={Single image super-resolution from transformed self-exemplars},
	author={Huang, Jia-Bin and Singh, Abhishek and Ahuja, Narendra},
	booktitle={Proceedings of the IEEE Conference on Computer Vision and Pattern Recognition},
	pages={5197--5206},
	year={2015}
}

@inproceedings{dong2014learning,
	title={Learning a deep convolutional network for image super-resolution},
	author={Dong, Chao and Loy, Chen Change and He, Kaiming and Tang, Xiaoou},
	booktitle={European conference on computer vision},
	pages={184--199},
	year={2014},
	organization={Springer}
}

@inproceedings{dong2016accelerating,
	title={Accelerating the super-resolution convolutional neural network},
	author={Dong, Chao and Loy, Chen Change and Tang, Xiaoou},
	booktitle={European conference on computer vision},
	pages={391--407},
	year={2016},
	organization={Springer}
}

@inproceedings{kim2016accurate,
	title={Accurate image super-resolution using very deep convolutional networks},
	author={Kim, Jiwon and Kwon Lee, Jung and Mu Lee, Kyoung},
	booktitle={Proceedings of the IEEE conference on computer vision and pattern recognition},
	pages={1646--1654},
	year={2016}
}

@inproceedings{kim2016deeply,
	title={Deeply-recursive convolutional network for image super-resolution},
	author={Kim, Jiwon and Kwon Lee, Jung and Mu Lee, Kyoung},
	booktitle={Proceedings of the IEEE conference on computer vision and pattern recognition},
	pages={1637--1645},
	year={2016}
}

@inproceedings{shi2016real,
	title={Real-time single image and video super-resolution using an efficient sub-pixel convolutional neural network},
	author={Shi, Wenzhe and Caballero, Jose and Husz{\'a}r, Ferenc and Totz, Johannes and Aitken, Andrew P and Bishop, Rob and Rueckert, Daniel and Wang, Zehan},
	booktitle={Proceedings of the IEEE conference on computer vision and pattern recognition},
	pages={1874--1883},
	year={2016}
}

@inproceedings{lai2017deep,
	title={Deep laplacian pyramid networks for fast and accurate super-resolution},
	author={Lai, Wei-Sheng and Huang, Jia-Bin and Ahuja, Narendra and Yang, Ming-Hsuan},
	booktitle={Proceedings of the IEEE conference on computer vision and pattern recognition},
	pages={624--632},
	year={2017}
}

@inproceedings{tai2017image,
	title={Image super-resolution via deep recursive residual network},
	author={Tai, Ying and Yang, Jian and Liu, Xiaoming},
	booktitle={Proceedings of the IEEE conference on computer vision and pattern recognition},
	pages={3147--3155},
	year={2017}
}

@inproceedings{haris2018deep,
	title={Deep back-projection networks for super-resolution},
	author={Haris, Muhammad and Shakhnarovich, Gregory and Ukita, Norimichi},
	booktitle={Proceedings of the IEEE conference on computer vision and pattern recognition},
	pages={1664--1673},
	year={2018}
}

@inproceedings{zhang2018image,
	title={Image super-resolution using very deep residual channel attention networks},
	author={Zhang, Yulun and Li, Kunpeng and Li, Kai and Wang, Lichen and Zhong, Bineng and Fu, Yun},
	booktitle={Proceedings of the European Conference on Computer Vision (ECCV)},
	pages={286--301},
	year={2018}
}

@inproceedings{zhang2018residual,
	title={Residual dense network for image super-resolution},
	author={Zhang, Yulun and Tian, Yapeng and Kong, Yu and Zhong, Bineng and Fu, Yun},
	booktitle={Proceedings of the IEEE Conference on Computer Vision and Pattern Recognition},
	pages={2472--2481},
	year={2018}
}

@article{kappeler2016video,
	title={Video super-resolution with convolutional neural networks},
	author={Kappeler, Armin and Yoo, Seunghwan and Dai, Qiqin and Katsaggelos, Aggelos K},
	journal={IEEE Transactions on Computational Imaging},
	volume={2},
	number={2},
	pages={109--122},
	year={2016},
	publisher={IEEE}
}

@inproceedings{liu2017robust,
	title={Robust video super-resolution with learned temporal dynamics},
	author={Liu, Ding and Wang, Zhaowen and Fan, Yuchen and Liu, Xianming and Wang, Zhangyang and Chang, Shiyu and Huang, Thomas},
	booktitle={Proceedings of the IEEE International Conference on Computer Vision},
	pages={2507--2515},
	year={2017}
}

@inproceedings{he2016deep,
	title={Deep residual learning for image recognition},
	author={He, Kaiming and Zhang, Xiangyu and Ren, Shaoqing and Sun, Jian},
	booktitle={Proceedings of the IEEE conference on computer vision and pattern recognition},
	pages={770--778},
	year={2016}
}

@inproceedings{jason2016back,
	title={Back to basics: Unsupervised learning of optical flow via brightness constancy and motion smoothness},
	author={Jason, J Yu and Harley, Adam W and Derpanis, Konstantinos G},
	booktitle={European Conference on Computer Vision},
	pages={3--10},
	year={2016},
	organization={Springer}
}

@inproceedings{sun2018pwc,
	title={PWC-Net: CNNs for optical flow using pyramid, warping, and cost volume},
	author={Sun, Deqing and Yang, Xiaodong and Liu, Ming-Yu and Kautz, Jan},
	booktitle={Proceedings of the IEEE Conference on Computer Vision and Pattern Recognition},
	pages={8934--8943},
	year={2018}
}

@inproceedings{jo2018deep,
	title={Deep video super-resolution network using dynamic upsampling filters without explicit motion compensation},
	author={Jo, Younghyun and Wug Oh, Seoung and Kang, Jaeyeon and Joo Kim, Seon},
	booktitle={Proceedings of the IEEE Conference on Computer Vision and Pattern Recognition},
	pages={3224--3232},
	year={2018}
}

@inproceedings{dosovitskiy2015flownet,
	title={Flownet: Learning optical flow with convolutional networks},
	author={Dosovitskiy, Alexey and Fischer, Philipp and Ilg, Eddy and Hausser, Philip and Hazirbas, Caner and Golkov, Vladimir and Van Der Smagt, Patrick and Cremers, Daniel and Brox, Thomas},
	booktitle={Proceedings of the IEEE international conference on computer vision},
	pages={2758--2766},
	year={2015}
}

@inproceedings{ilg2017flownet,
	title={Flownet 2.0: Evolution of optical flow estimation with deep networks},
	author={Ilg, Eddy and Mayer, Nikolaus and Saikia, Tonmoy and Keuper, Margret and Dosovitskiy, Alexey and Brox, Thomas},
	booktitle={Proceedings of the IEEE conference on computer vision and pattern recognition},
	pages={2462--2470},
	year={2017}
}

@inproceedings{mayer2016large,
	title={A large dataset to train convolutional networks for disparity, optical flow, and scene flow estimation},
	author={Mayer, Nikolaus and Ilg, Eddy and Hausser, Philip and Fischer, Philipp and Cremers, Daniel and Dosovitskiy, Alexey and Brox, Thomas},
	booktitle={Proceedings of the IEEE Conference on Computer Vision and Pattern Recognition},
	pages={4040--4048},
	year={2016}
}

@inproceedings{huang2015bidirectional,
	title={Bidirectional recurrent convolutional networks for multi-frame super-resolution},
	author={Huang, Yan and Wang, Wei and Wang, Liang},
	booktitle={Advances in Neural Information Processing Systems},
	pages={235--243},
	year={2015}
}

@article{takeda2009super,
	title={Super-resolution without explicit subpixel motion estimation},
	author={Takeda, Hiroyuki and Milanfar, Peyman and Protter, Matan and Elad, Michael},
	journal={IEEE Transactions on Image Processing},
	volume={18},
	number={9},
	pages={1958--1975},
	year={2009},
	publisher={IEEE}
}

@inproceedings{wang2005patch,
	title={Patch based blind image super resolution},
	author={Wang, Qiang and Tang, Xiaoou and Shum, Harry},
	booktitle={Tenth IEEE International Conference on Computer Vision (ICCV'05) Volume 1},
	volume={1},
	pages={709--716},
	year={2005},
	organization={IEEE}
}

@article{kindermann2005deblurring,
	title={Deblurring and denoising of images by nonlocal functionals},
	author={Kindermann, Stefan and Osher, Stanley and Jones, Peter W},
	journal={Multiscale Modeling \& Simulation},
	volume={4},
	number={4},
	pages={1091--1115},
	year={2005},
	publisher={SIAM}
}

@article{zhang2010bregmanized,
	title={Bregmanized nonlocal regularization for deconvolution and sparse reconstruction},
	author={Zhang, Xiaoqun and Burger, Martin and Bresson, Xavier and Osher, Stanley},
	journal={SIAM Journal on Imaging Sciences},
	volume={3},
	number={3},
	pages={253--276},
	year={2010},
	publisher={SIAM}
}

@article{protter2008generalizing,
	title={Generalizing the nonlocal-means to super-resolution reconstruction},
	author={Protter, Matan and Elad, Michael and Takeda, Hiroyuki and Milanfar, Peyman},
	journal={IEEE Transactions on image processing},
	volume={18},
	number={1},
	pages={36--51},
	year={2008},
	publisher={IEEE}
}

@inproceedings{xu2017deep,
	title={Deep image matting},
	author={Xu, Ning and Price, Brian and Cohen, Scott and Huang, Thomas},
	booktitle={Proceedings of the IEEE Conference on Computer Vision and Pattern Recognition},
	pages={2970--2979},
	year={2017}
}

@inproceedings{liu2017video,
	title={Video frame synthesis using deep voxel flow},
	author={Liu, Ziwei and Yeh, Raymond A and Tang, Xiaoou and Liu, Yiming and Agarwala, Aseem},
	booktitle={Proceedings of the IEEE International Conference on Computer Vision},
	pages={4463--4471},
	year={2017}
}

@inproceedings{tao2018scale,
	title={Scale-recurrent network for deep image deblurring},
	author={Tao, Xin and Gao, Hongyun and Shen, Xiaoyong and Wang, Jue and Jia, Jiaya},
	booktitle={Proceedings of the IEEE Conference on Computer Vision and Pattern Recognition},
	pages={8174--8182},
	year={2018}
}

@inproceedings{pathak2016context,
	title={Context encoders: Feature learning by inpainting},
	author={Pathak, Deepak and Krahenbuhl, Philipp and Donahue, Jeff and Darrell, Trevor and Efros, Alexei A},
	booktitle={Proceedings of the IEEE conference on computer vision and pattern recognition},
	pages={2536--2544},
	year={2016}
}

@inproceedings{dai2015jointly,
	title={Jointly Optimized Regressors for Image Super-resolution},
	author={Dai, Dengxin and Timofte, Radu and Van Gool, Luc},
	booktitle={Computer Graphics Forum},
	volume={34},
	number={2},
	pages={95--104},
	year={2015},
	organization={Wiley Online Library}
}

@inproceedings{liu2010high,
	title={A high-quality video denoising algorithm based on reliable motion estimation},
	author={Liu, Ce and Freeman, William T},
	booktitle={European conference on computer vision},
	pages={706--719},
	year={2010},
	organization={Springer}
}

@inproceedings{butler2012naturalistic,
	title={A naturalistic open source movie for optical flow evaluation},
	author={Butler, Daniel J and Wulff, Jonas and Stanley, Garrett B and Black, Michael J},
	booktitle={European conference on computer vision},
	pages={611--625},
	year={2012},
	organization={Springer}
}

@inproceedings{ronneberger2015u,
  title={U-net: Convolutional networks for biomedical image segmentation},
  author={Ronneberger, Olaf and Fischer, Philipp and Brox, Thomas},
  booktitle={International Conference on Medical image computing and computer-assisted intervention},
  pages={234--241},
  year={2015},
  organization={Springer}
}

@inproceedings{ranjan2017optical,
	title={Optical flow estimation using a spatial pyramid network},
	author={Ranjan, Anurag and Black, Michael J},
	booktitle={Proceedings of the IEEE Conference on Computer Vision and Pattern Recognition},
	pages={4161--4170},
	year={2017}
}
