# Supplementary material
Source: ML conference proceedings conference paper supplement (https://www.ecva.net/papers/eccv_2020/papers_ECCV/html/123550341_ECCV_2020_paper.php)
Supplement: Supplementary file 9 [file 123550341-supp.zip › 1086-supp/1086-supp.blg]

This is BibTeX, Version 0.99d (TeX Live 2019)
Capacity: max_strings=100000, hash_size=100000, hash_prime=85009
The top-level auxiliary file: 1086-supp.aux
The style file: splncs04.bst
Database file #1: 1086-supp.bib
You've used 9 entries,
            2850 wiz_defined-function locations,
            665 strings with 6699 characters,
and the built_in function-call counts, 6648 in all, are:
= -- 589
> -- 223
< -- 10
+ -- 91
- -- 82
* -- 407
:= -- 825
add.period$ -- 17
call.type$ -- 9
change.case$ -- 84
chr.to.int$ -- 0
cite$ -- 9
duplicate$ -- 544
empty$ -- 566
format.name$ -- 91
if$ -- 1484
int.to.chr$ -- 0
int.to.str$ -- 9
missing$ -- 105
newline$ -- 33
num.names$ -- 18
pop$ -- 221
preamble$ -- 1
purify$ -- 59
quote$ -- 0
skip$ -- 212
stack$ -- 0
substring$ -- 445
swap$ -- 309
text.length$ -- 10
text.prefix$ -- 0
top$ -- 0
type$ -- 36
warning$ -- 0
while$ -- 54
width$ -- 10
write$ -- 95
