# Supplementary material
Source: ML conference proceedings conference paper supplement (https://www.ecva.net/papers/eccv_2020/papers_ECCV/html/123550341_ECCV_2020_paper.php)
Supplement: Supplementary file 9 [file 123550341-supp.zip › 1086-supp/1086-supp.log]

This is pdfTeX, Version 3.14159265-2.6-1.40.20 (TeX Live 2019) (preloaded format=pdflatex 2019.10.22)  17 JUL 2020 13:07
entering extended mode
 restricted \write18 enabled.
 %&-line parsing enabled.
**1086-supp.tex
(./1086-supp.tex
LaTeX2e <2018-12-01>
(./llncs.cls
Document Class: llncs 2018/03/10 v2.20 
 LaTeX document class for Lecture Notes in Computer Science
(/usr/local/texlive/2019/texmf-dist/tex/latex/base/article.cls
Document Class: article 2018/09/03 v1.4i Standard LaTeX document class
(/usr/local/texlive/2019/texmf-dist/tex/latex/base/size10.clo
File: size10.clo 2018/09/03 v1.4i Standard LaTeX file (size option)
)
\c@part=\count80
\c@section=\count81
\c@subsection=\count82
\c@subsubsection=\count83
\c@paragraph=\count84
\c@subparagraph=\count85
\c@figure=\count86
\c@table=\count87
\abovecaptionskip=\skip41
\belowcaptionskip=\skip42
\bibindent=\dimen102
)
(/usr/local/texlive/2019/texmf-dist/tex/latex/tools/multicol.sty
Package: multicol 2018/12/27 v1.8v multicolumn formatting (FMi)
\c@tracingmulticols=\count88
\mult@box=\box27
\multicol@leftmargin=\dimen103
\c@unbalance=\count89
\c@collectmore=\count90
\doublecol@number=\count91
\multicoltolerance=\count92
\multicolpretolerance=\count93
\full@width=\dimen104
\page@free=\dimen105
\premulticols=\dimen106
\postmulticols=\dimen107
\multicolsep=\skip43
\multicolbaselineskip=\skip44
\partial@page=\box28
\last@line=\box29
\maxbalancingoverflow=\dimen108
\mult@rightbox=\box30
\mult@grightbox=\box31
\mult@gfirstbox=\box32
\mult@firstbox=\box33
\@tempa=\box34
\@tempa=\box35
\@tempa=\box36
\@tempa=\box37
\@tempa=\box38
\@tempa=\box39
\@tempa=\box40
\@tempa=\box41
\@tempa=\box42
\@tempa=\box43
\@tempa=\box44
\@tempa=\box45
\@tempa=\box46
\@tempa=\box47
\@tempa=\box48
\@tempa=\box49
\@tempa=\box50
\c@columnbadness=\count94
\c@finalcolumnbadness=\count95
\last@try=\dimen109
\multicolovershoot=\dimen110
\multicolundershoot=\dimen111
\mult@nat@firstbox=\box51
\colbreak@box=\box52
\mc@col@check@num=\count96
)
(/usr/local/texlive/2019/texmf-dist/tex/latex/oberdiek/aliascnt.sty
Package: aliascnt 2018/09/07 v1.5 Alias counters (HO)
)
\c@chapter=\count97
LaTeX Font Info:    Redeclaring math symbol \Gamma on input line 362.
LaTeX Font Info:    Redeclaring math symbol \Delta on input line 363.
LaTeX Font Info:    Redeclaring math symbol \Theta on input line 364.
LaTeX Font Info:    Redeclaring math symbol \Lambda on input line 365.
LaTeX Font Info:    Redeclaring math symbol \Xi on input line 366.
LaTeX Font Info:    Redeclaring math symbol \Pi on input line 367.
LaTeX Font Info:    Redeclaring math symbol \Sigma on input line 368.
LaTeX Font Info:    Redeclaring math symbol \Upsilon on input line 369.
LaTeX Font Info:    Redeclaring math symbol \Phi on input line 370.
LaTeX Font Info:    Redeclaring math symbol \Psi on input line 371.
LaTeX Font Info:    Redeclaring math symbol \Omega on input line 372.
\tocchpnum=\dimen112
\tocsecnum=\dimen113
\tocsectotal=\dimen114
\tocsubsecnum=\dimen115
\tocsubsectotal=\dimen116
\tocsubsubsecnum=\dimen117
\tocsubsubsectotal=\dimen118
\tocparanum=\dimen119
\tocparatotal=\dimen120
\tocsubparanum=\dimen121
\@tempcntc=\count98
\fnindent=\dimen122
\c@@inst=\count99
\c@@auth=\count100
\c@auco=\count101
\instindent=\dimen123
\authrun=\box53
\authorrunning=\toks14
\tocauthor=\toks15
\titrun=\box54
\titlerunning=\toks16
\toctitle=\toks17
\c@theorem=\count102
\c@case=\count103
\c@conjecture=\count104
\c@corollary=\count105
\c@definition=\count106
\c@example=\count107
\c@exercise=\count108
\c@lemma=\count109
\c@note=\count110
\c@problem=\count111
\c@property=\count112
\c@proposition=\count113
\c@question=\count114
\c@solution=\count115
\c@remark=\count116
\headlineindent=\dimen124
)
(/usr/local/texlive/2019/texmf-dist/tex/latex/graphics/graphicx.sty
Package: graphicx 2017/06/01 v1.1a Enhanced LaTeX Graphics (DPC,SPQR)

(/usr/local/texlive/2019/texmf-dist/tex/latex/graphics/keyval.sty
Package: keyval 2014/10/28 v1.15 key=value parser (DPC)
\KV@toks@=\toks18
)
(/usr/local/texlive/2019/texmf-dist/tex/latex/graphics/graphics.sty
Package: graphics 2017/06/25 v1.2c Standard LaTeX Graphics (DPC,SPQR)

(/usr/local/texlive/2019/texmf-dist/tex/latex/graphics/trig.sty
Package: trig 2016/01/03 v1.10 sin cos tan (DPC)
)
(/usr/local/texlive/2019/texmf-dist/tex/latex/graphics-cfg/graphics.cfg
File: graphics.cfg 2016/06/04 v1.11 sample graphics configuration
)
Package graphics Info: Driver file: pdftex.def on input line 99.

(/usr/local/texlive/2019/texmf-dist/tex/latex/graphics-def/pdftex.def
File: pdftex.def 2018/01/08 v1.0l Graphics/color driver for pdftex
))
\Gin@req@height=\dimen125
\Gin@req@width=\dimen126
)
(./comment.sty
\CommentStream=\write3
 Excluding comment 'comment')
(/usr/local/texlive/2019/texmf-dist/tex/latex/amsmath/amsmath.sty
Package: amsmath 2018/12/01 v2.17b AMS math features
\@mathmargin=\skip45

For additional information on amsmath, use the `?' option.
(/usr/local/texlive/2019/texmf-dist/tex/latex/amsmath/amstext.sty
Package: amstext 2000/06/29 v2.01 AMS text

(/usr/local/texlive/2019/texmf-dist/tex/latex/amsmath/amsgen.sty
File: amsgen.sty 1999/11/30 v2.0 generic functions
\@emptytoks=\toks19
\ex@=\dimen127
))
(/usr/local/texlive/2019/texmf-dist/tex/latex/amsmath/amsbsy.sty
Package: amsbsy 1999/11/29 v1.2d Bold Symbols
\pmbraise@=\dimen128
)
(/usr/local/texlive/2019/texmf-dist/tex/latex/amsmath/amsopn.sty
Package: amsopn 2016/03/08 v2.02 operator names
)
\inf@bad=\count117
LaTeX Info: Redefining \frac on input line 223.
\uproot@=\count118
\leftroot@=\count119
LaTeX Info: Redefining \overline on input line 385.
\classnum@=\count120
\DOTSCASE@=\count121
LaTeX Info: Redefining \ldots on input line 482.
LaTeX Info: Redefining \dots on input line 485.
LaTeX Info: Redefining \cdots on input line 606.
\Mathstrutbox@=\box55
\strutbox@=\box56
\big@size=\dimen129
LaTeX Font Info:    Redeclaring font encoding OML on input line 729.
LaTeX Font Info:    Redeclaring font encoding OMS on input line 730.


Package amsmath Warning: Unable to redefine math accent \vec.

\macc@depth=\count122
\c@MaxMatrixCols=\count123
\dotsspace@=\muskip10
\c@parentequation=\count124
\dspbrk@lvl=\count125
\tag@help=\toks20
\row@=\count126
\column@=\count127
\maxfields@=\count128
\andhelp@=\toks21
\eqnshift@=\dimen130
\alignsep@=\dimen131
\tagshift@=\dimen132
\tagwidth@=\dimen133
\totwidth@=\dimen134
\lineht@=\dimen135
\@envbody=\toks22
\multlinegap=\skip46
\multlinetaggap=\skip47
\mathdisplay@stack=\toks23
LaTeX Info: Redefining \[ on input line 2844.
LaTeX Info: Redefining \] on input line 2845.
) (/usr/local/texlive/2019/texmf-dist/tex/latex/amsfonts/amssymb.sty
Package: amssymb 2013/01/14 v3.01 AMS font symbols

(/usr/local/texlive/2019/texmf-dist/tex/latex/amsfonts/amsfonts.sty
Package: amsfonts 2013/01/14 v3.01 Basic AMSFonts support
\symAMSa=\mathgroup4
\symAMSb=\mathgroup5
LaTeX Font Info:    Overwriting math alphabet `\mathfrak' in version `bold'
(Font)                  U/euf/m/n --> U/euf/b/n on input line 106.
))
(/usr/local/texlive/2019/texmf-dist/tex/latex/graphics/color.sty
Package: color 2016/07/10 v1.1e Standard LaTeX Color (DPC)

(/usr/local/texlive/2019/texmf-dist/tex/latex/graphics-cfg/color.cfg
File: color.cfg 2016/01/02 v1.6 sample color configuration
)
Package color Info: Driver file: pdftex.def on input line 147.
)
(./1086-supp.aux)
\openout1 = `1086-supp.aux'.

LaTeX Font Info:    Checking defaults for OML/cmm/m/it on input line 17.
LaTeX Font Info:    ... okay on input line 17.
LaTeX Font Info:    Checking defaults for T1/cmr/m/n on input line 17.
LaTeX Font Info:    ... okay on input line 17.
LaTeX Font Info:    Checking defaults for OT1/cmr/m/n on input line 17.
LaTeX Font Info:    ... okay on input line 17.
LaTeX Font Info:    Checking defaults for OMS/cmsy/m/n on input line 17.
LaTeX Font Info:    ... okay on input line 17.
LaTeX Font Info:    Checking defaults for OMX/cmex/m/n on input line 17.
LaTeX Font Info:    ... okay on input line 17.
LaTeX Font Info:    Checking defaults for U/cmr/m/n on input line 17.
LaTeX Font Info:    ... okay on input line 17.

(/usr/local/texlive/2019/texmf-dist/tex/context/base/mkii/supp-pdf.mkii
[Loading MPS to PDF converter (version 2006.09.02).]
\scratchcounter=\count129
\scratchdimen=\dimen136
\scratchbox=\box57
\nofMPsegments=\count130
\nofMParguments=\count131
\everyMPshowfont=\toks24
\MPscratchCnt=\count132
\MPscratchDim=\dimen137
\MPnumerator=\count133
\makeMPintoPDFobject=\count134
\everyMPtoPDFconversion=\toks25
) (/usr/local/texlive/2019/texmf-dist/tex/latex/oberdiek/epstopdf-base.sty
Package: epstopdf-base 2016/05/15 v2.6 Base part for package epstopdf

(/usr/local/texlive/2019/texmf-dist/tex/generic/oberdiek/infwarerr.sty
Package: infwarerr 2016/05/16 v1.4 Providing info/warning/error messages (HO)
)
(/usr/local/texlive/2019/texmf-dist/tex/latex/oberdiek/grfext.sty
Package: grfext 2016/05/16 v1.2 Manage graphics extensions (HO)

(/usr/local/texlive/2019/texmf-dist/tex/generic/oberdiek/kvdefinekeys.sty
Package: kvdefinekeys 2016/05/16 v1.4 Define keys (HO)

(/usr/local/texlive/2019/texmf-dist/tex/generic/oberdiek/ltxcmds.sty
Package: ltxcmds 2016/05/16 v1.23 LaTeX kernel commands for general use (HO)
)))
(/usr/local/texlive/2019/texmf-dist/tex/latex/oberdiek/kvoptions.sty
Package: kvoptions 2016/05/16 v3.12 Key value format for package options (HO)

(/usr/local/texlive/2019/texmf-dist/tex/generic/oberdiek/kvsetkeys.sty
Package: kvsetkeys 2016/05/16 v1.17 Key value parser (HO)

(/usr/local/texlive/2019/texmf-dist/tex/generic/oberdiek/etexcmds.sty
Package: etexcmds 2016/05/16 v1.6 Avoid name clashes with e-TeX commands (HO)

(/usr/local/texlive/2019/texmf-dist/tex/generic/oberdiek/ifluatex.sty
Package: ifluatex 2016/05/16 v1.4 Provides the ifluatex switch (HO)
Package ifluatex Info: LuaTeX not detected.
))))
(/usr/local/texlive/2019/texmf-dist/tex/generic/oberdiek/pdftexcmds.sty
Package: pdftexcmds 2018/09/10 v0.29 Utility functions of pdfTeX for LuaTeX (HO
)

(/usr/local/texlive/2019/texmf-dist/tex/generic/oberdiek/ifpdf.sty
Package: ifpdf 2018/09/07 v3.3 Provides the ifpdf switch
)
Package pdftexcmds Info: LuaTeX not detected.
Package pdftexcmds Info: \pdf@primitive is available.
Package pdftexcmds Info: \pdf@ifprimitive is available.
Package pdftexcmds Info: \pdfdraftmode found.
)
Package epstopdf-base Info: Redefining graphics rule for `.eps' on input line 4
38.
Package grfext Info: Graphics extension search list:
(grfext)             [.pdf,.png,.jpg,.mps,.jpeg,.jbig2,.jb2,.PDF,.PNG,.JPG,.JPE
G,.JBIG2,.JB2,.eps]
(grfext)             \AppendGraphicsExtensions on input line 456.

(/usr/local/texlive/2019/texmf-dist/tex/latex/latexconfig/epstopdf-sys.cfg
File: epstopdf-sys.cfg 2010/07/13 v1.3 Configuration of (r)epstopdf for TeX Liv
e
))
LaTeX Font Info:    Try loading font information for U+msa on input line 54.

(/usr/local/texlive/2019/texmf-dist/tex/latex/amsfonts/umsa.fd
File: umsa.fd 2013/01/14 v3.01 AMS symbols A
)
LaTeX Font Info:    Try loading font information for U+msb on input line 54.

(/usr/local/texlive/2019/texmf-dist/tex/latex/amsfonts/umsb.fd
File: umsb.fd 2013/01/14 v3.01 AMS symbols B
)
LaTeX Font Info:    Try loading font information for OMS+cmtt on input line 54.

LaTeX Font Info:    No file OMScmtt.fd. on input line 54.


LaTeX Font Warning: Font shape `OMS/cmtt/m/n' undefined
(Font)              using `OMS/cmsy/m/n' instead
(Font)              for symbol `textbraceleft' on input line 54.

[1


{/usr/local/texlive/2019/texmf-var/fonts/map/pdftex/updmap/pdftex.map}]
<pics/pic1.pdf, id=17, 1252.11183pt x 484.06747pt>
File: pics/pic1.pdf Graphic file (type pdf)
<use pics/pic1.pdf>
Package pdftex.def Info: pics/pic1.pdf  used on input line 97.
(pdftex.def)             Requested size: 347.12354pt x 134.19366pt.
<pics/pic2.pdf, id=18, 1248.36186pt x 484.03133pt>
File: pics/pic2.pdf Graphic file (type pdf)
<use pics/pic2.pdf>
Package pdftex.def Info: pics/pic2.pdf  used on input line 105.
(pdftex.def)             Requested size: 347.12354pt x 134.58986pt.
<pics/pic3.pdf, id=19, 1249.83943pt x 482.47252pt>
File: pics/pic3.pdf Graphic file (type pdf)
<use pics/pic3.pdf>
Package pdftex.def Info: pics/pic3.pdf  used on input line 113.
(pdftex.def)             Requested size: 347.12354pt x 134.00182pt.


LaTeX Warning: `h' float specifier changed to `ht'.

<pics/pic4.pdf, id=20, 1246.67355pt x 480.4369pt>
File: pics/pic4.pdf Graphic file (type pdf)
<use pics/pic4.pdf>
Package pdftex.def Info: pics/pic4.pdf  used on input line 121.
(pdftex.def)             Requested size: 347.12354pt x 133.77365pt.

LaTeX Warning: `h' float specifier changed to `ht'.

[2 <./pics/pic1.pdf> <./pics/pic2.pdf>] [3 <./pics/pic3.pdf> <./pics/pic4.pdf>]
<pics/general.pdf, id=99, 636.1167pt x 221.62198pt>
File: pics/general.pdf Graphic file (type pdf)
<use pics/general.pdf>
Package pdftex.def Info: pics/general.pdf  used on input line 134.
(pdftex.def)             Requested size: 347.12354pt x 120.93883pt.
[4 <./pics/general.pdf>] (./1086-supp.bbl) [5

] (./1086-supp.aux)

LaTeX Font Warning: Some font shapes were not available, defaults substituted.

 ) 
Here is how much of TeX's memory you used:
 2881 strings out of 492616
 37951 string characters out of 6129480
 112420 words of memory out of 5000000
 6746 multiletter control sequences out of 15000+600000
 10126 words of font info for 40 fonts, out of 8000000 for 9000
 1141 hyphenation exceptions out of 8191
 41i,9n,27p,813b,287s stack positions out of 5000i,500n,10000p,200000b,80000s
</usr/local/texlive/2019/texmf-dist/fonts/type1/public/amsfonts/cm/cmbx12.pfb
></usr/local/texlive/2019/texmf-dist/fonts/type1/public/amsfonts/cm/cmbx9.pfb><
/usr/local/texlive/2019/texmf-dist/fonts/type1/public/amsfonts/cm/cmmi10.pfb></
usr/local/texlive/2019/texmf-dist/fonts/type1/public/amsfonts/cm/cmmi7.pfb></us
r/local/texlive/2019/texmf-dist/fonts/type1/public/amsfonts/cm/cmr10.pfb></usr/
local/texlive/2019/texmf-dist/fonts/type1/public/amsfonts/cm/cmr6.pfb></usr/loc
al/texlive/2019/texmf-dist/fonts/type1/public/amsfonts/cm/cmr7.pfb></usr/local/
texlive/2019/texmf-dist/fonts/type1/public/amsfonts/cm/cmr9.pfb></usr/local/tex
live/2019/texmf-dist/fonts/type1/public/amsfonts/cm/cmsy10.pfb></usr/local/texl
ive/2019/texmf-dist/fonts/type1/public/amsfonts/cm/cmsy9.pfb></usr/local/texliv
e/2019/texmf-dist/fonts/type1/public/amsfonts/cm/cmtt9.pfb>
Output written on 1086-supp.pdf (5 pages, 9198118 bytes).
PDF statistics:
 164 PDF objects out of 1000 (max. 8388607)
 99 compressed objects within 1 object stream
 0 named destinations out of 1000 (max. 500000)
 26 words of extra memory for PDF output out of 10000 (max. 10000000)
