# Supplementary material
Source: ML conference proceedings conference paper supplement (https://www.ecva.net/papers/eccv_2020/papers_ECCV/html/123550341_ECCV_2020_paper.php)

GT

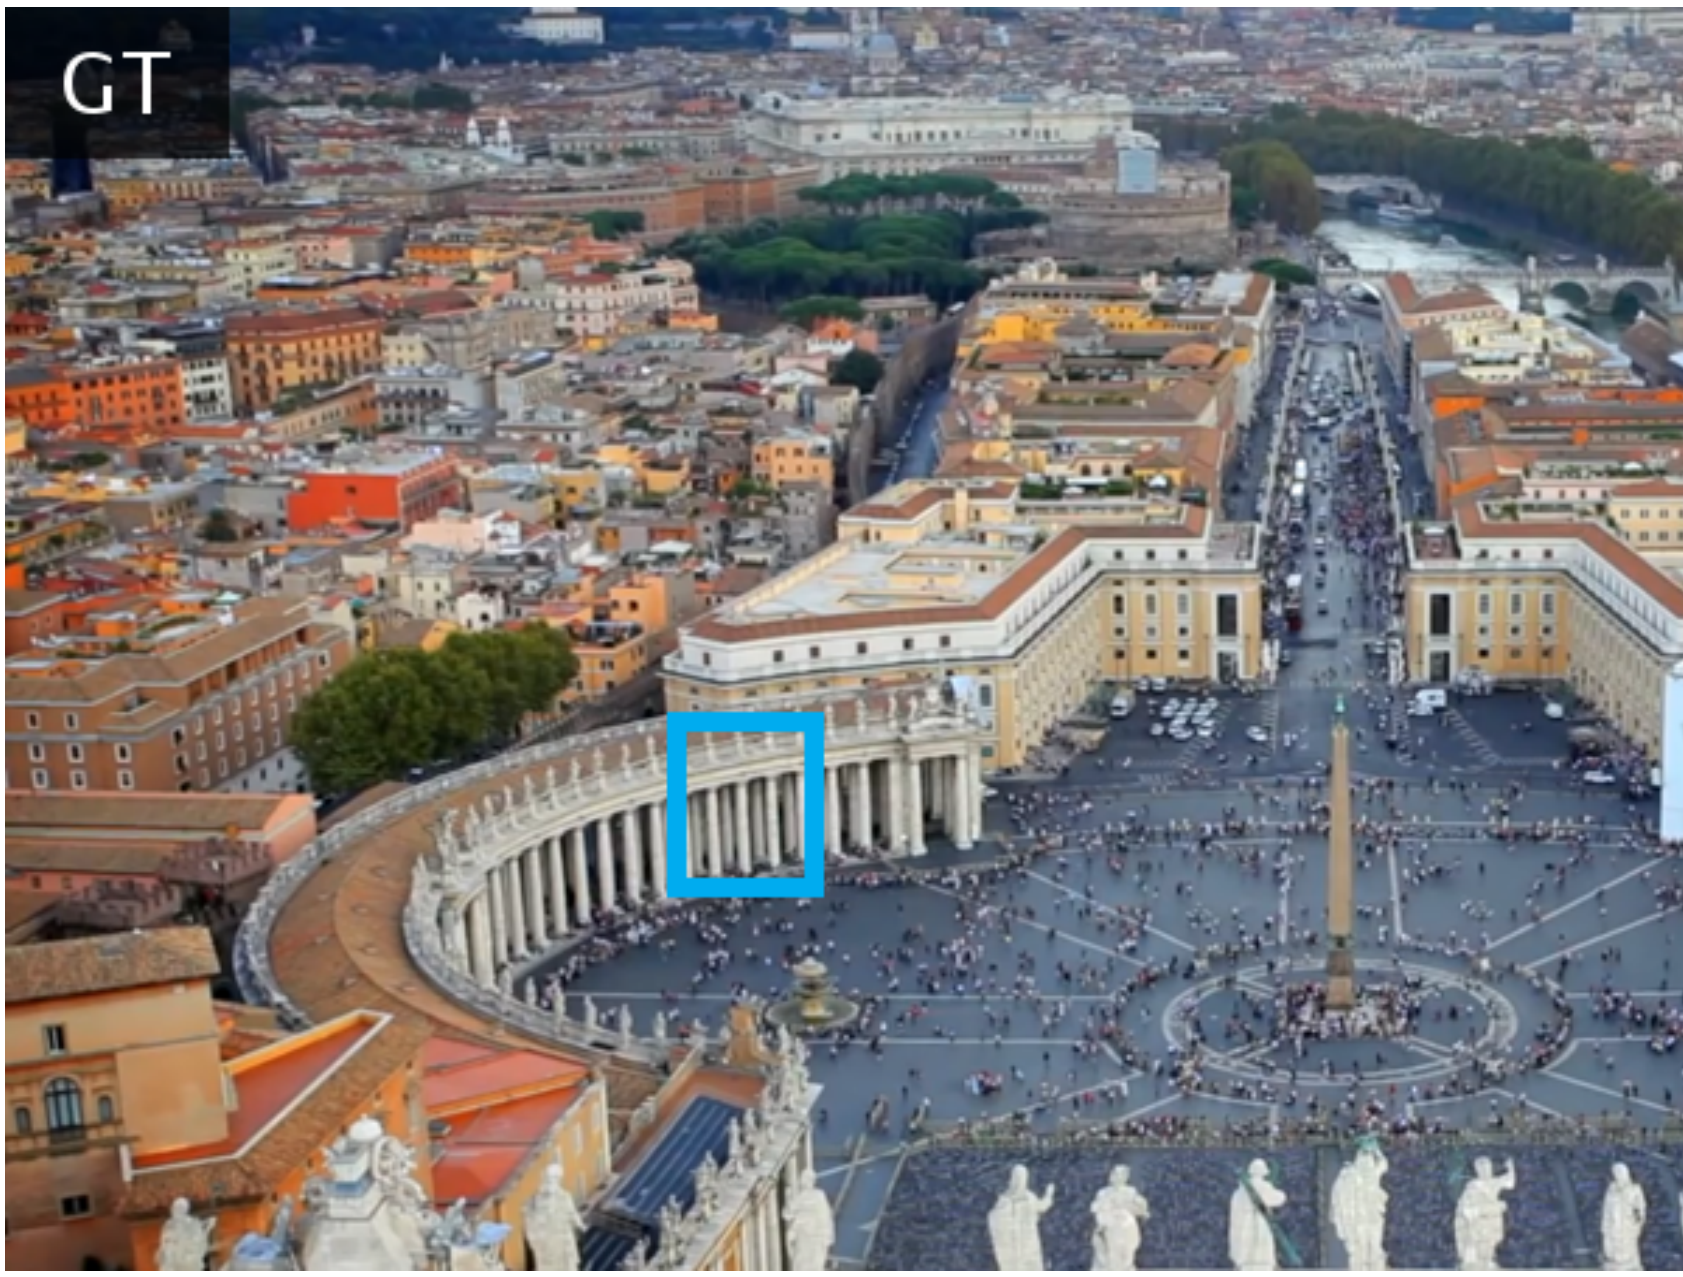

Bicubic

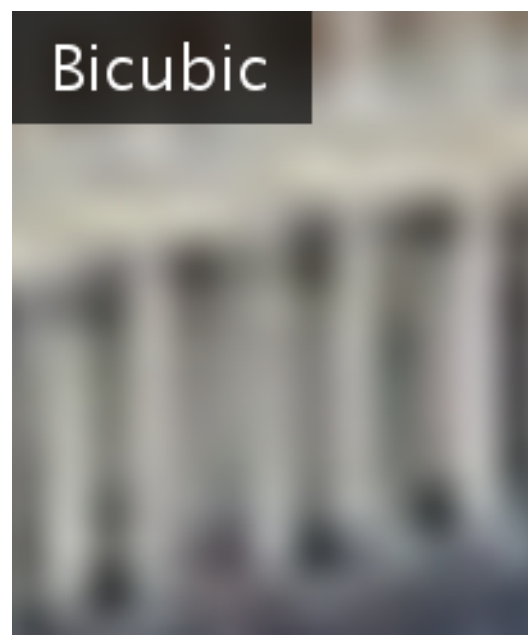

TOF

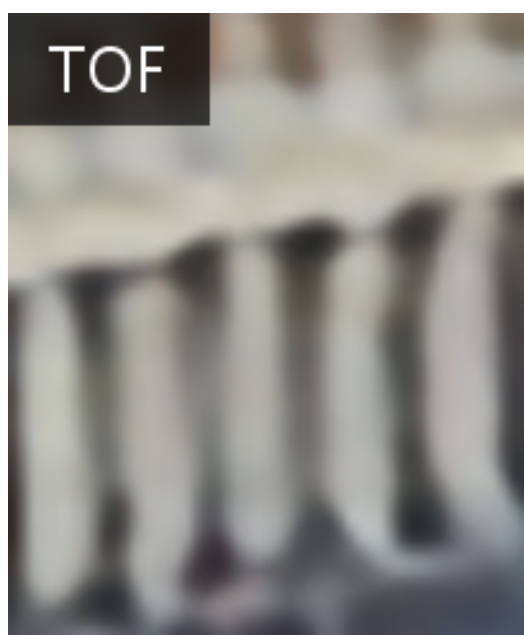

SPMC

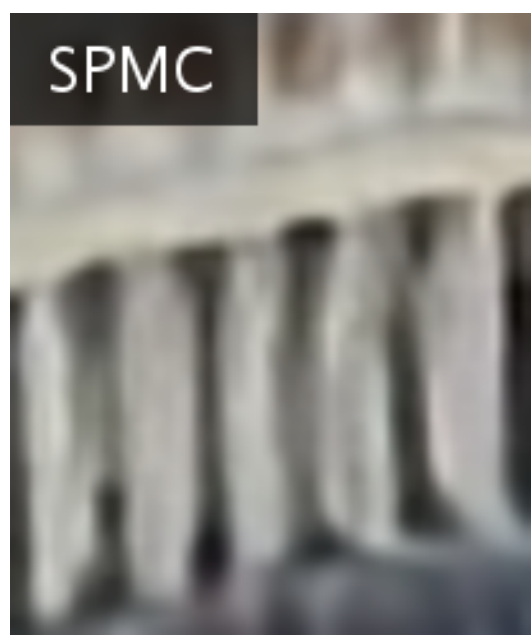

DUF

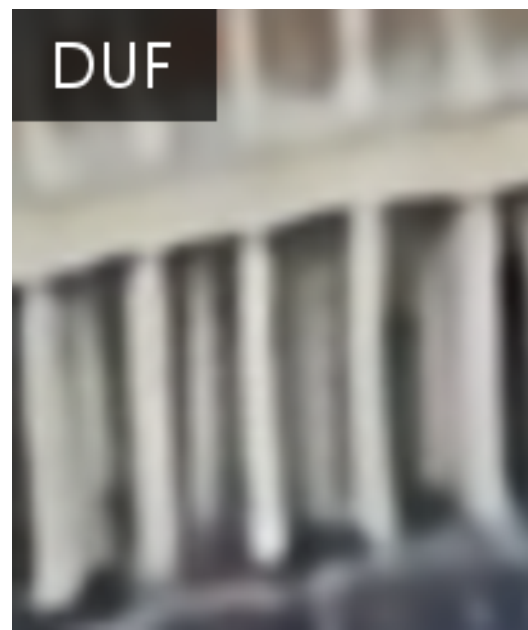

RBPN

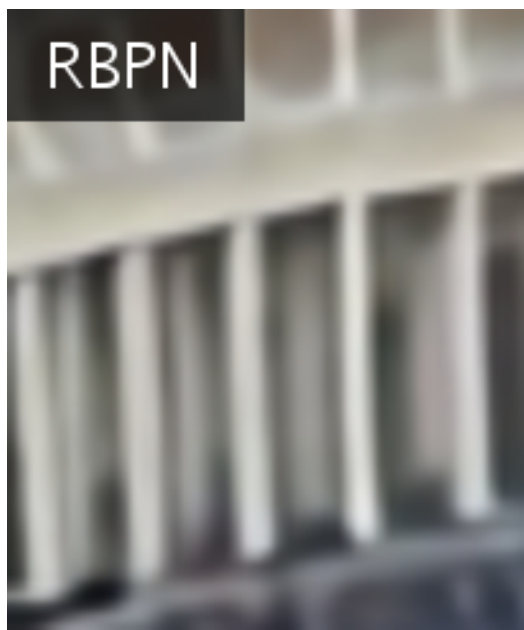

Ours

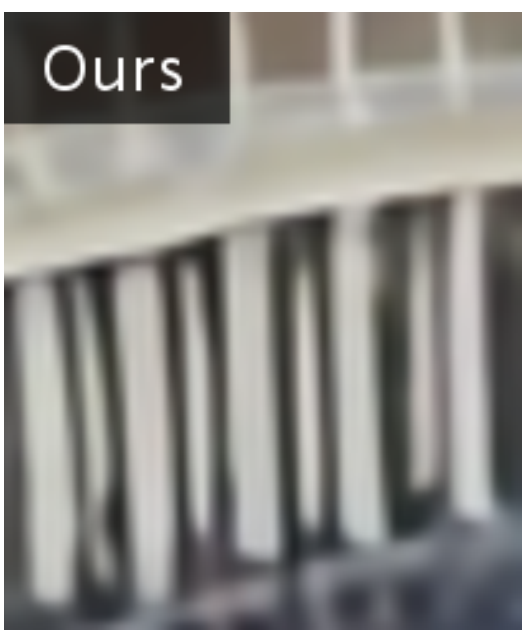

Supplement: Supplementary file 1 [file 123550341-supp.zip]

LR

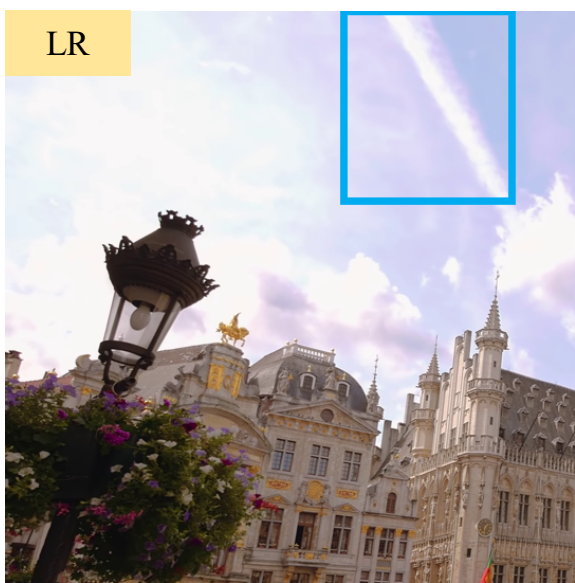

Ours

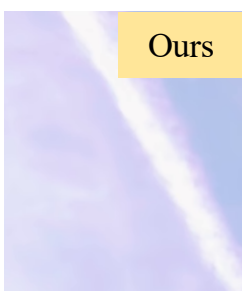

EDVR

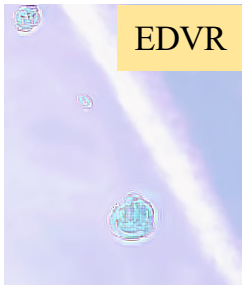

LR

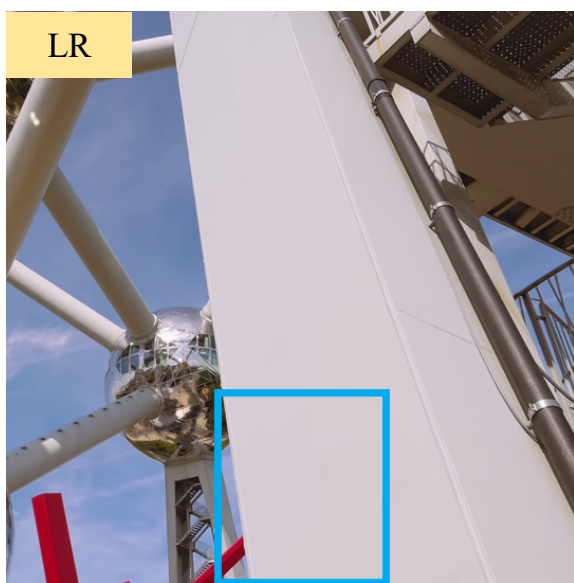

Ours

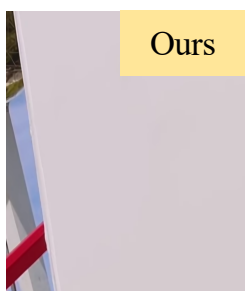

EDVR

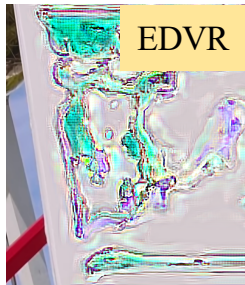

Supplement: Supplementary file 2 [file 123550341-supp.zip]

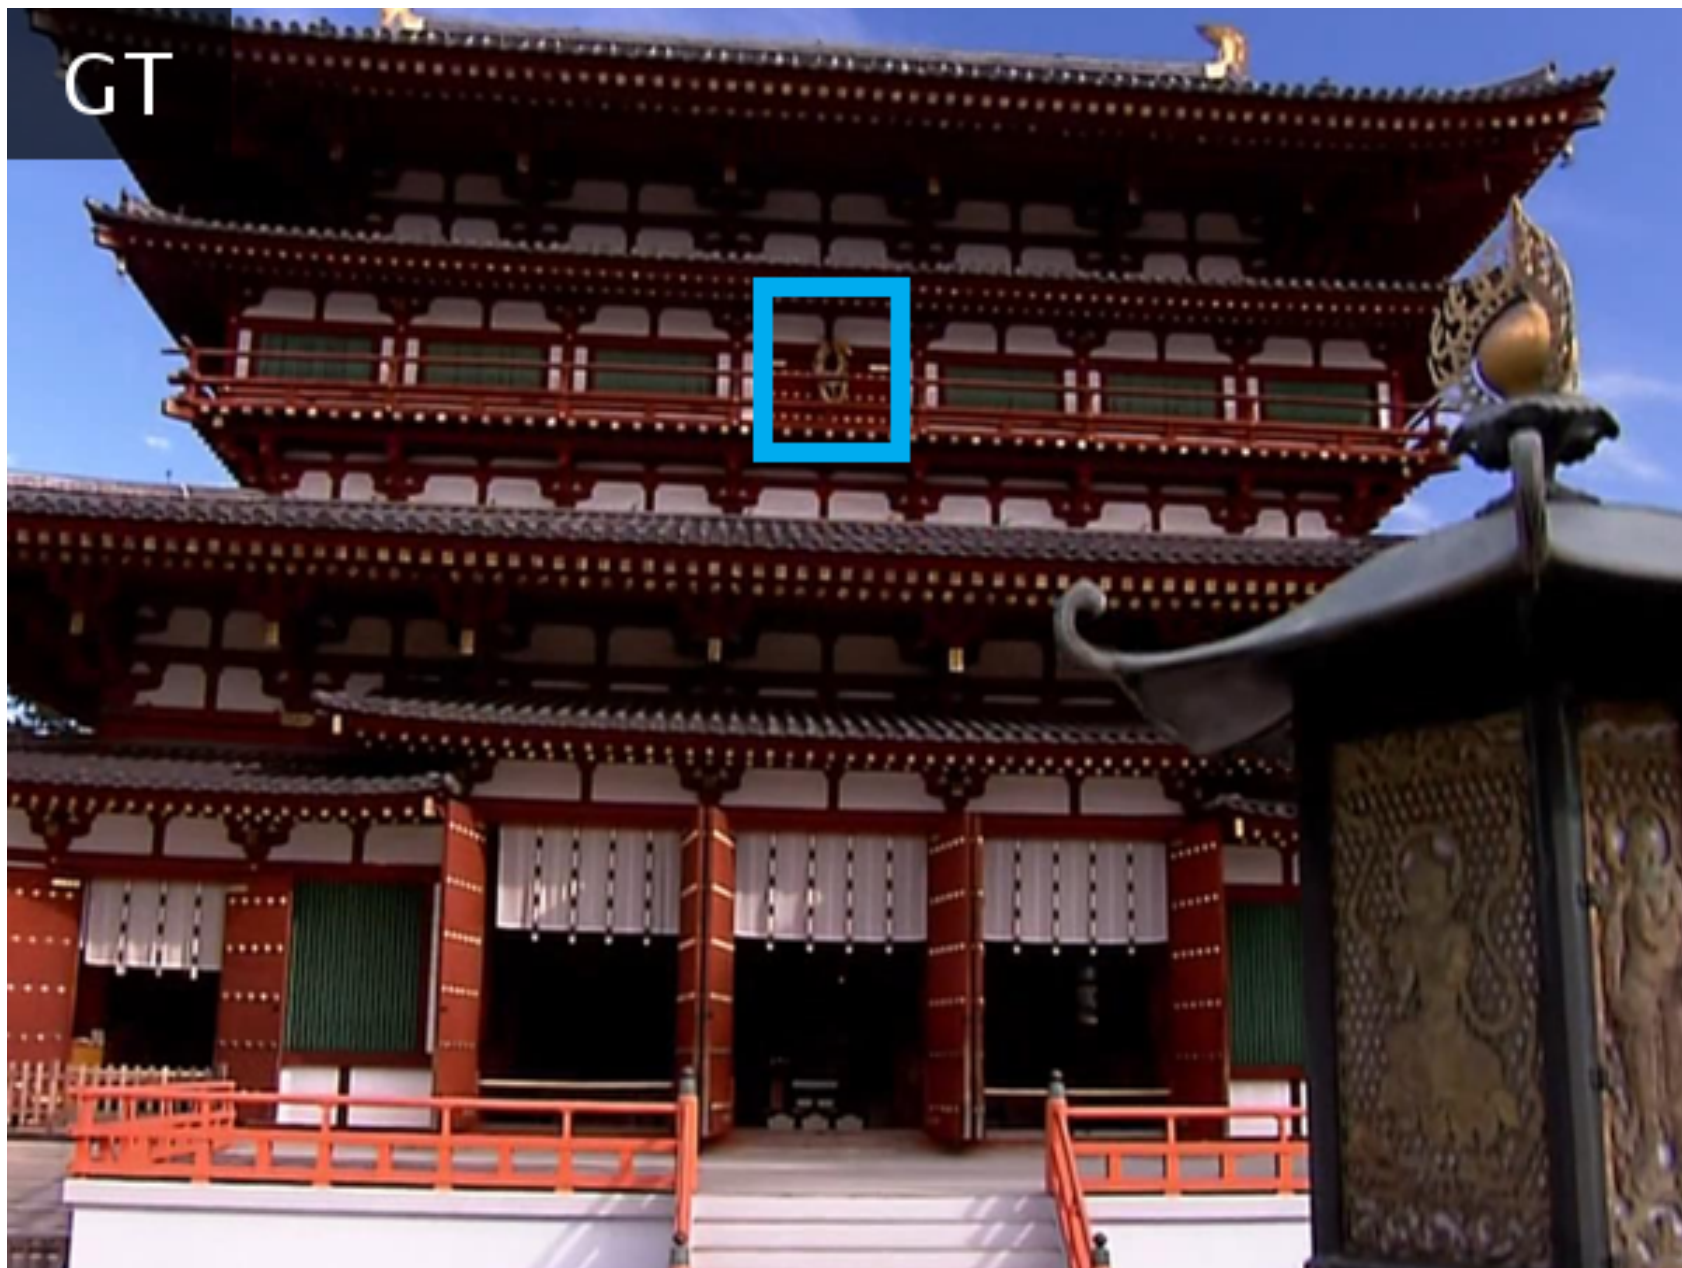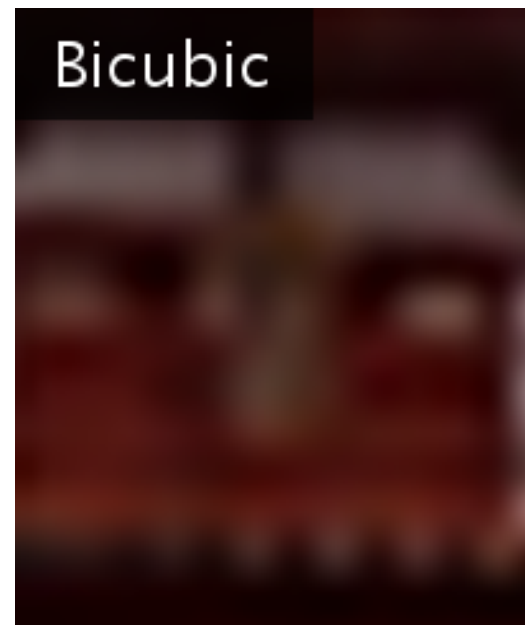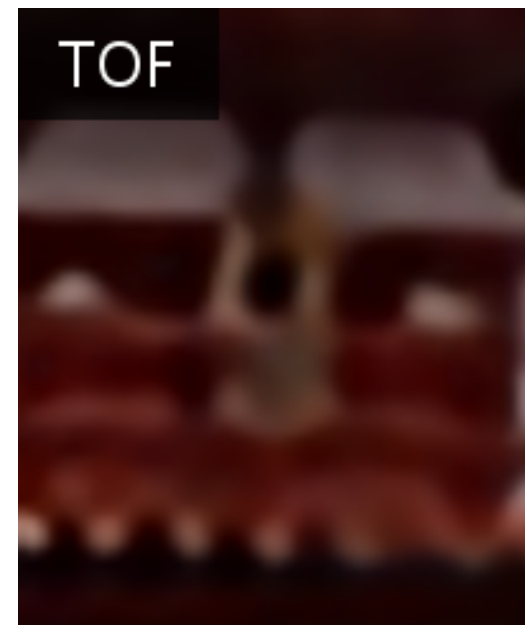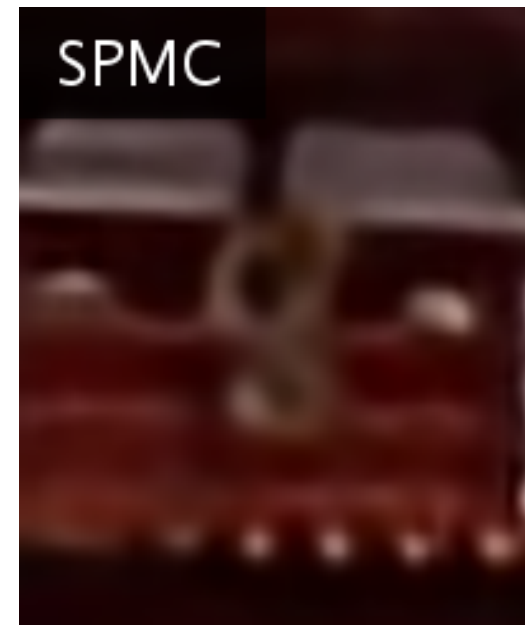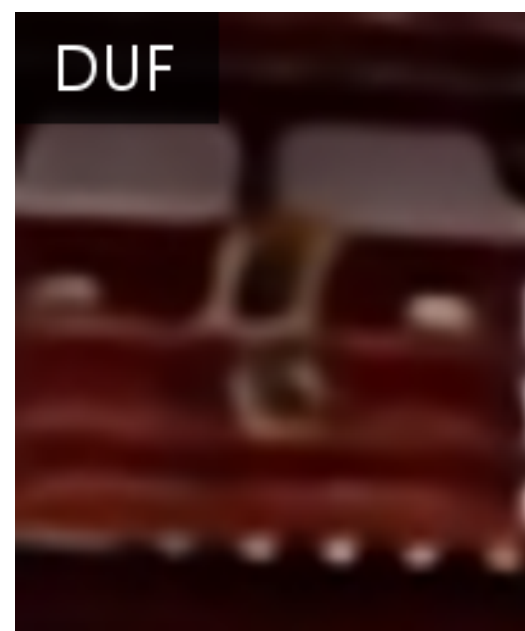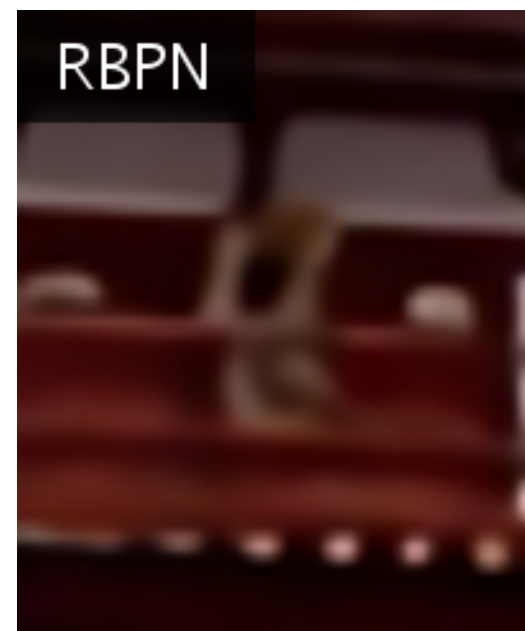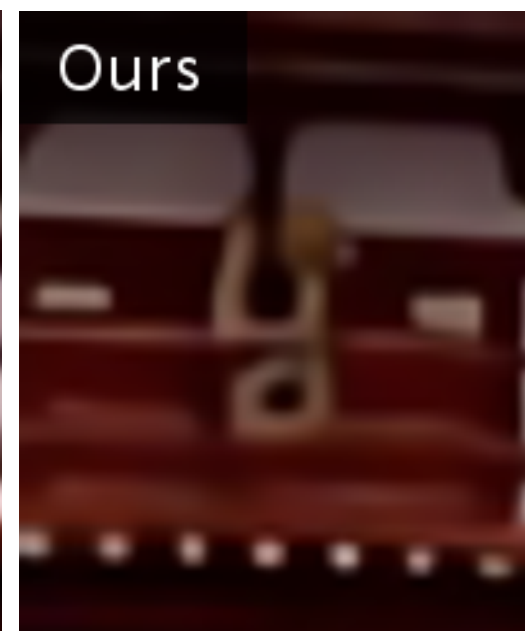

Supplement: Supplementary file 3 [file 123550341-supp.zip]

GT

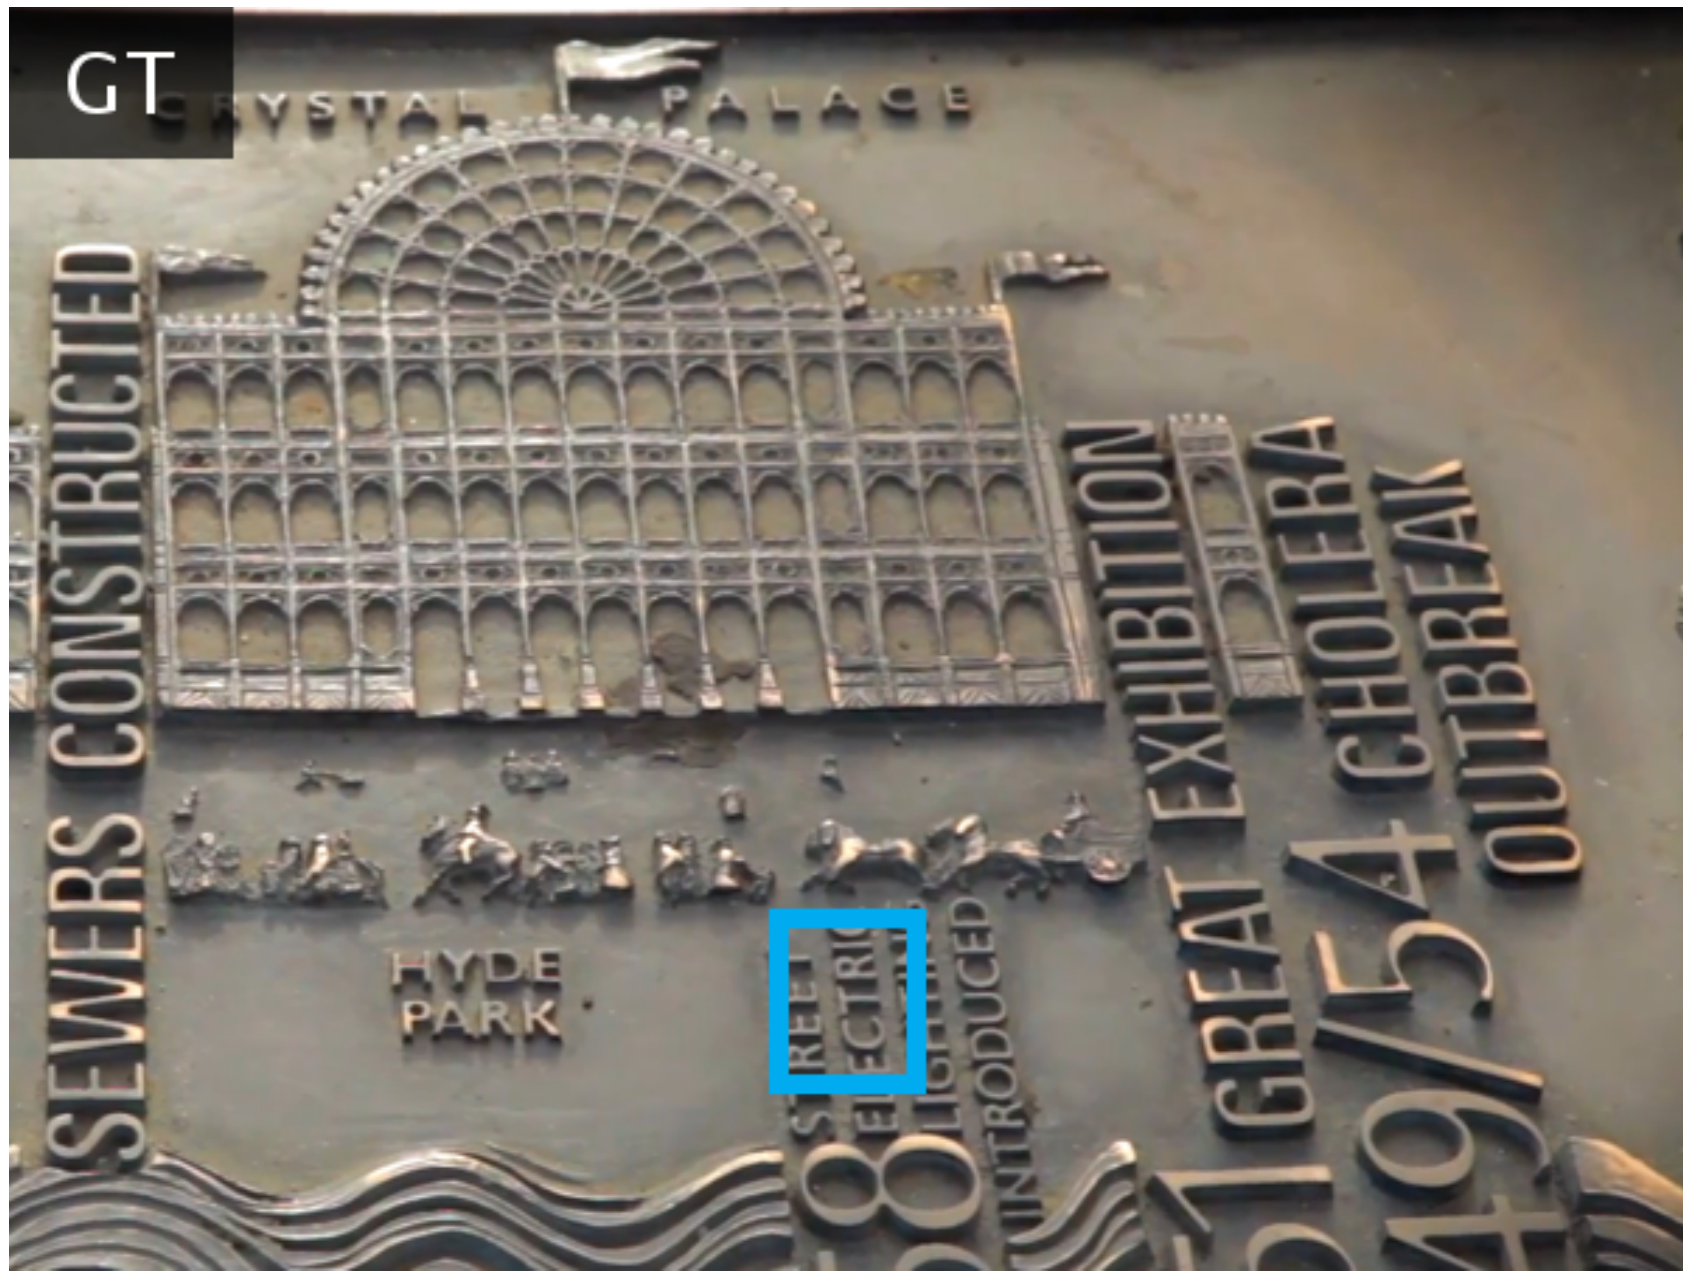

Bicubic

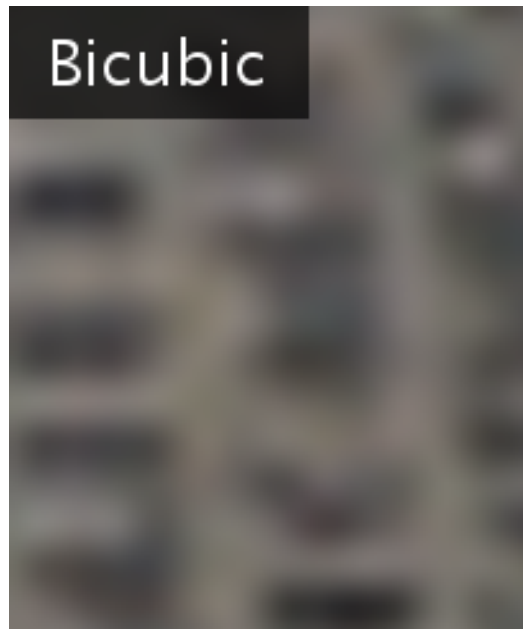

TOF

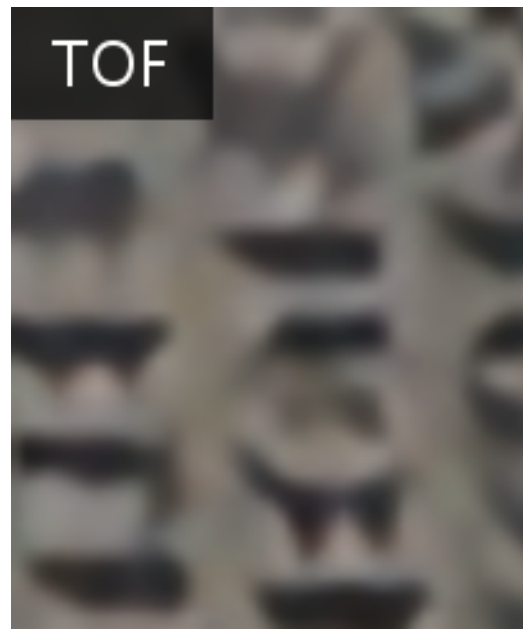

SPMC

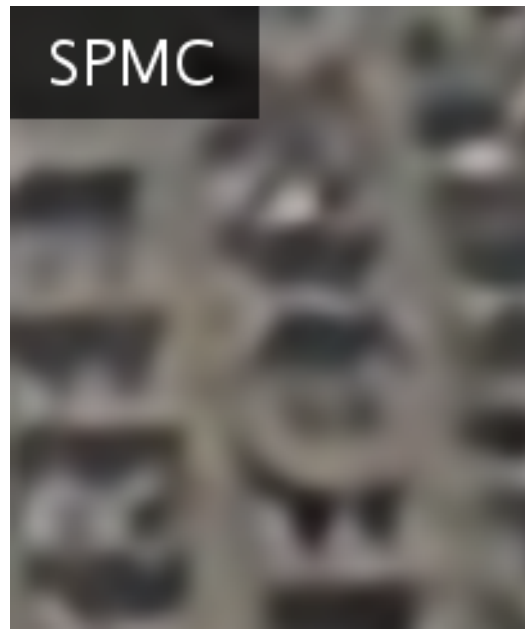

DUF

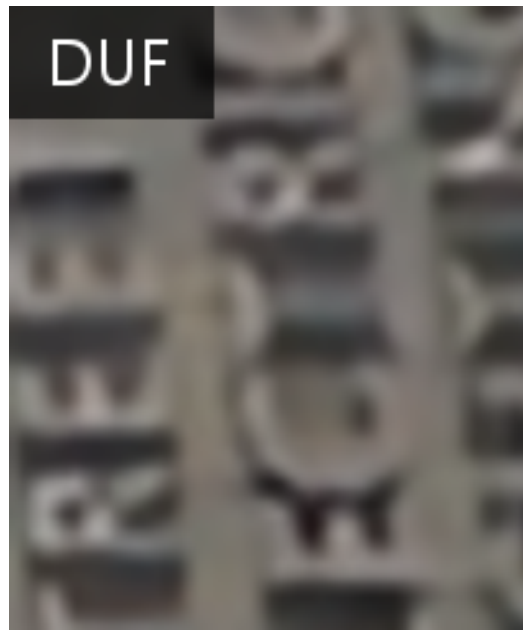

RBPN

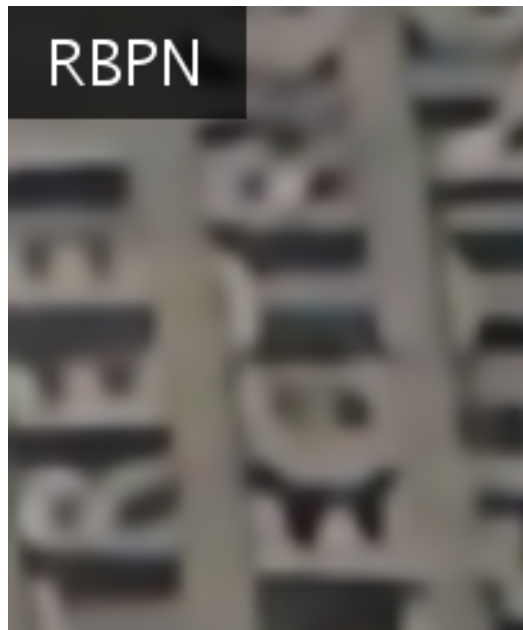

Ours

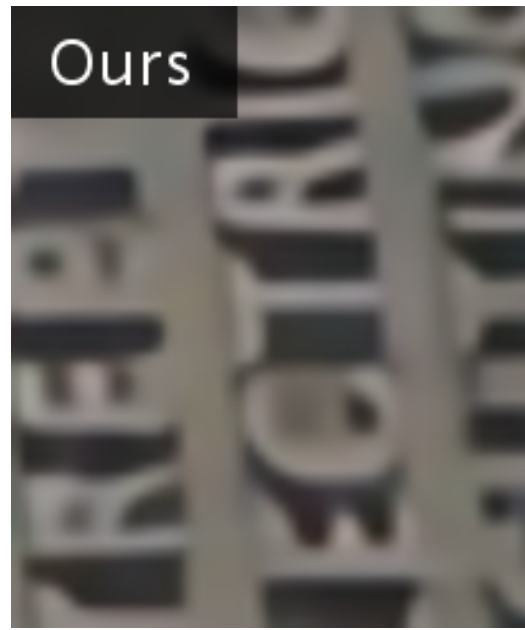

Supplement: Supplementary file 5 [file 123550341-supp.zip]

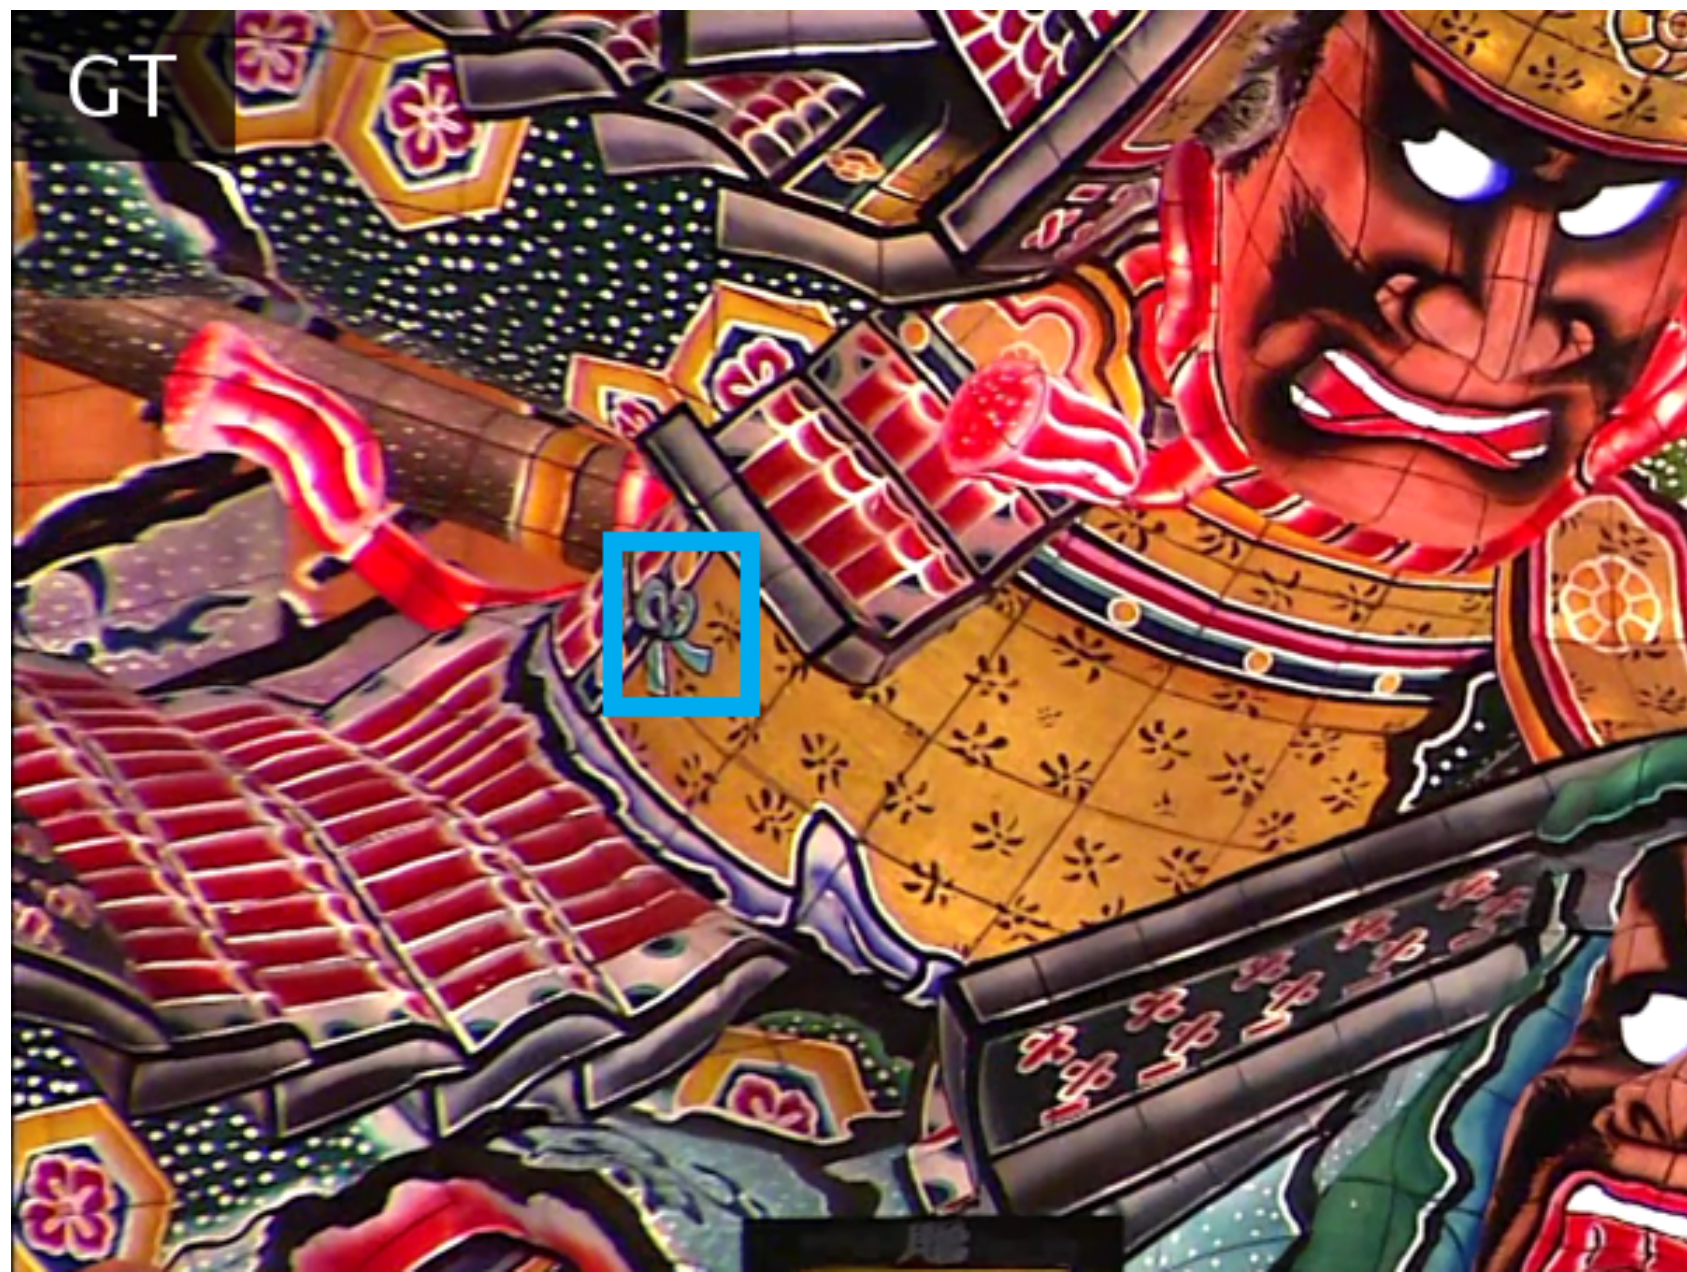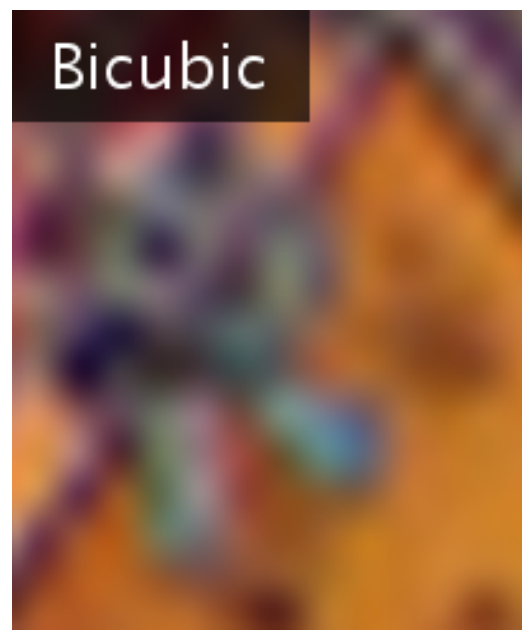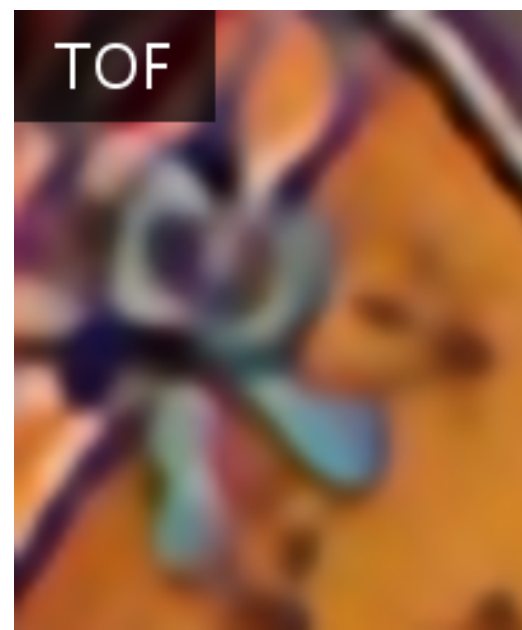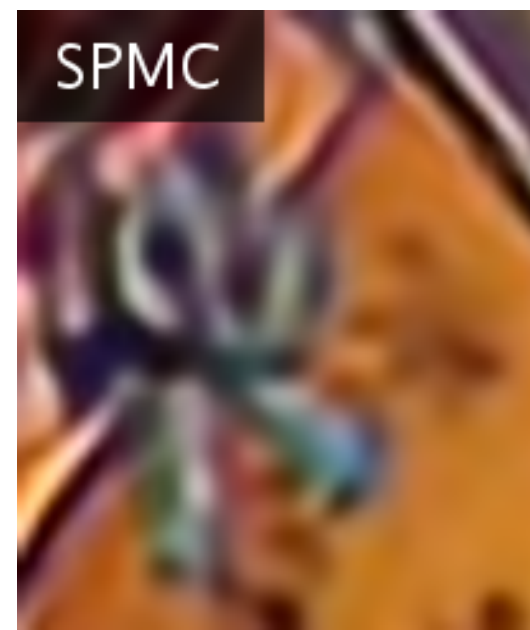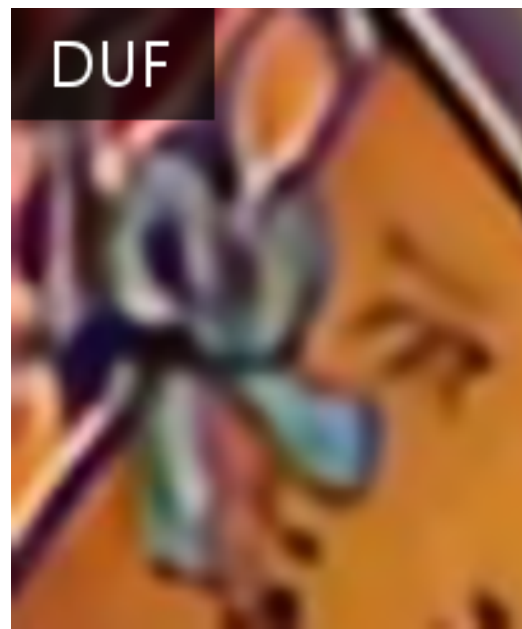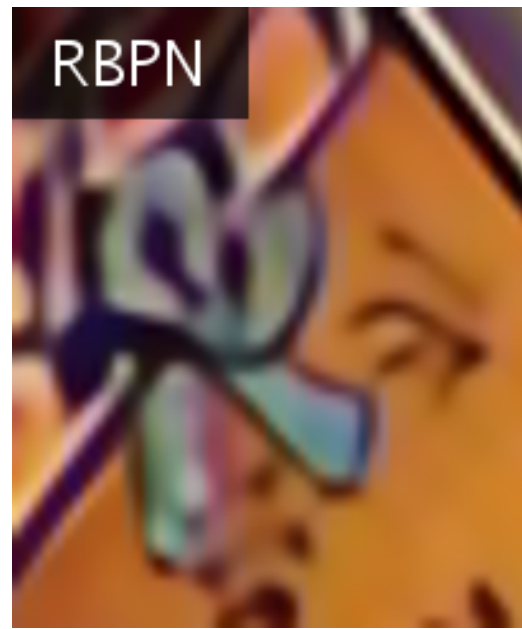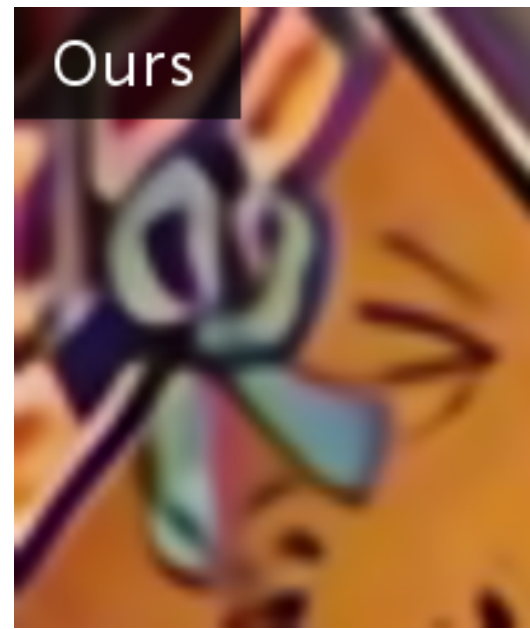

Supplement: Supplementary file 7 [file 123550341-supp.zip]
